# KCNN4 is a diagnostic and prognostic biomarker that promotes papillary thyroid cancer progression

Jialiang Wen<sup>1</sup>, Bangyi Lin<sup>1</sup>, Lizhi Lin<sup>1</sup>, Yizuo Chen<sup>1</sup>, Ouchen Wang<sup>1</sup>

<sup>1</sup>Department of Thyroid and Breast Surgery, The First Affiliated Hospital of Wenzhou Medical University, Wenzhou, Zhejiang, People's Republic of China

**Correspondence to:** Ouchen Wang; email: [woc@wmu.edu.cn](mailto:woc@wmu.edu.cn)

**Keywords:** KCNN4, biomarker, papillary thyroid cancer (PTC), epithelial-mesenchymal transition (EMT), apoptosis

**Received:** March 9, 2020

**Accepted:** June 29, 2020

**Published:** August 28, 2020

**Copyright:** Wen et al. This is an open-access article distributed under the terms of the Creative Commons Attribution License (CC BY 3.0), which permits unrestricted use, distribution, and reproduction in any medium, provided the original author and source are credited.

## ABSTRACT

The incidence of thyroid cancer remains high worldwide, and papillary thyroid cancer (PTC) is the most common type. Potassium Calcium-Activated Channel Subfamily N Member 4 (*KCNN4*) has been reported as an oncogene in various cancers. We examined expression of *KCNN4* in public databases and discovered that it is upregulated in PTC. We verified this finding using our own validated cohort and RNA sequencing data. We also found that *KCNN4* is a diagnostic and prognostic biomarker that is associated with disease-free survival, immune infiltration, and several other clinicopathological features of PTC. Gene Set Enrichment Analysis indicated that apoptotic and epithelial-mesenchymal transition gene sets are both upregulated in PTC patients with higher *KCNN4* levels. In PTC cell lines, silencing *KCNN4* inhibited cell proliferation, migration and invasion. Moreover, quantitative real-time PCR and Western blotting indicated that silencing *KCNN4* increased expression of apoptotic genes in PTC cells and reduced the expression of genes involved in their epithelial-mesenchymal transition. These results suggest that *KCNN4* promotes PTC progression by inducing epithelial-mesenchymal transition and suppressing apoptosis, which suggests *KCNN4* may be a useful diagnostic and prognostic biomarker of PTC.

## INTRODUCTION

In recent years, the incidence of thyroid cancer (TC) has increased sharply at an annual rate of 3%. Thus, 40,170 new cases of TC are expected in the US in 2020, accounting for approximately 4% of all cancer cases in women [1, 2]. Papillary thyroid carcinoma (PTC) accounts for 83.6% of all TC cases [3]. PTC patients usually have a relatively good prognosis, with a long-term survival rate of 90-95% after surgery or radioiodine therapy; however, the subset of patients who develop local invasion or distant metastasis may be at greater risk of recurrence or death [3]. Lymph node metastasis (LNM) occurs in about 10-50% of PTC patients, and Wada et al. reported that the recurrence rates were 16.3% and 0% in patients with and without LNM, respectively [4, 5]. The overall survival rate of

patients with local recurrence is about 70-85%, while the long-term survival rate of patients with distant metastasis is 30-60% [6-9]. Therefore, it is extremely important to identify biomarkers that can discriminate between high-risk and low-risk PTC patients.

The B-type Raf Kinase (*BRAF*) V600E mutation has been found in about 50% of PTC patients, particularly those with the aggressive subtype [10, 11]. In some studies, the *BRAF* V600E mutation has been associated with poorer clinicopathological outcomes of PTC [12, 13]; however, several studies have demonstrated that the *BRAF* V600E status alone is not an adequate prognostic biomarker of PTC [14-16]. The synergistic effects of *BRAF* V600E mutations and Telomerase Reverse Transcriptase promoter mutations are thought to generate more aggressive clinical characteristics

and worse prognoses than the individual mutations in PTC patients [17, 18]. Mutations in *RAS*, *RET* and *PIK3CA* (Phosphatidylinositol-4,5-Bisphosphate 3-Kinase Catalytic Subunit Alpha) have also been observed in PTC [19, 20]. Based on genomic, epigenomic and proteomic profiling, PTC can be classified as BRAF<sup>V600E</sup>-like or RAS-like. BRAF<sup>V600E</sup>-like PTC (driven by BRAF<sup>V600E</sup>) cannot respond to negative feedback from Extracellular Signal-Regulated Kinase (ERK) to RAF, so Mitogen-Activated Protein Kinase (MAPK) signaling is hyperactivated. On the other hand, RAS-like PTC (driven by RAS and Receptor Tyrosine Kinase fusions) accepts feedback from ERK, and thus exhibits aberrant activation of Phosphoinositide 3-Kinase signaling and lower MAPK activity than BRAF<sup>V600E</sup>-like PTC [21]. Despite tremendous progress in TC research, many molecular characteristics of TC are not well understood, so further study on the tumorigenesis and progression of TC is needed.

Ion channels of the plasma membrane are known to be involved in various cancers [22]. For example, Potassium Voltage-Gated Channel Subfamily H Member 1 is associated with a poor prognosis in ovarian cancer [23], and Piezo Type Mechanosensitive Ion Channel Component 1 promotes prostate cancer proliferation by activating the Akt/Mammalian Target of Rapamycin pathway [24]. Regarding thyroid cancer, Voltage Dependent Anion Channel 2 improves the viability of PTC cell lines [25], whereas Sodium Voltage-Gated Channel Beta Subunit 4 is an independent indicator of enhanced recurrence-free survival in PTC patients [26]. Thus, ion channels may have essential functions in PTC.

The Potassium Calcium-Activated Channel Subfamily N (KCNN) family includes four proteins (KCNN1-KCNN4) that constitute a heterotetrameric voltage-independent potassium channel. The KCNNs are involved in various cancers: low *KCNN3* expression promotes drug resistance and may predict a poor prognosis in ovarian cancer [27], high *KCNN4* expression is associated with poor survival in pancreatic cancer patients [28], and *KCNN2* is overexpressed in proximal tumors compared to distal tumors in colorectal cancer [29]. However, the involvement of the KCNN family in TC is still unknown.

In the present study, we examined *KCNN4* expression in PTC tissues using various online datasets and our own locally validated data. We also analyzed the diagnostic and prognostic value of *KCNN4* expression and its relationship with the clinicopathological features of PTC. Finally, we performed loss-of-function assays to explore the function of KCNN4 in PTC cell lines. Our work suggests that KCNN4 may be an essential biomarker and tumor promoter in PTC.

## RESULTS

### *KCNN4* is significantly upregulated in PTC

To analyze the expression of the four KCNN family members in PTC, we downloaded transcriptome sequencing data and microarray data from The Cancer Genome Atlas (TCGA) and GSE58689, respectively. Only *KCNN4* was significantly overexpressed in tumor tissues compared to nontumorous thyroid tissues (Figure 1A). Furthermore, we mined the differentially expressed genes between PTC tissues and adjacent normal tissues in the GSE3678 and GSE9115 datasets. After data normalization, 90 and 100 differentially expressed genes were extracted from GSE3678 and GSE9115, respectively (adjusted p-value < 0.05 and log<sub>2</sub>|fold change| ≥ 2). As shown in the heatmap (Figure 1B), *KCNN4* was markedly upregulated in PTC tissues among the top 50 significantly differentially expressed genes in both datasets, based on the adjusted p-value (GSE3678: *KCNN4*, log<sub>2</sub>|fold change|=2.30, false discovery rate [FDR]=8.40×10<sup>-5</sup>; GSE9115: *KCNN4*, log<sub>2</sub>|fold change|=3.73, FDR=0.01). Next, the Tumor Immune Estimation Resource (TIMER) database was used to perform a pan-cancer analysis of *KCNN4* expression. The results indicated that *KCNN4* was upregulated in various cancers in TCGA (Figure 1C).

The mRNA levels of *KCNN4* in TC tissues and adjacent nontumorous tissues in the aforementioned databases are shown in Figure 2A–2D (GSE58689: PTC tissues 7.21 ± 1.24, Normal tissues 4.25 ± 0.74, p<0.0001; GSE3678: PTC tissues 270.8 ± 123.5, Normal tissues 52.50 ± 19.48, p<0.01; GSE9115: PTC tissues 2.92 ± 1.50, Normal tissues -0.70 ± 1.11, p<0.01; TCGA: PTC tissues 48.82 ± 51.50, Normal tissues 4.44 ± 6.13, p<0.0001). We also performed RNA sequencing on 70 pairs of PTC tissues and matched adjacent nontumorous tissues, and observed the same trend (Figure 2E; PTC tissues 1868 ± 1127, Normal tissues 197.3 ± 245.3, p<0.0001). Furthermore, we used quantitative real-time PCR (qRT-PCR) to analyze *KCNN4* expression in 42 pairs of PTC tissues and matched normal thyroid tissues (validated cohort). As expected, *KCNN4* mRNA levels were significantly greater in PTC tissues than in normal thyroid tissues (Figure 2F; PTC tissues 12.59 ± 7.26, Normal tissues 1.90 ± 3.44, p<0.0001). These findings demonstrated that *KCNN4* was overexpressed in PTC tissues.

### *KCNN4* overexpression is associated with a range of clinicopathological factors in PTC

Next, we evaluated the correlation between *KCNN4* expression and clinical features of PTC in TCGA and our validated cohort. Patients were split into two groups

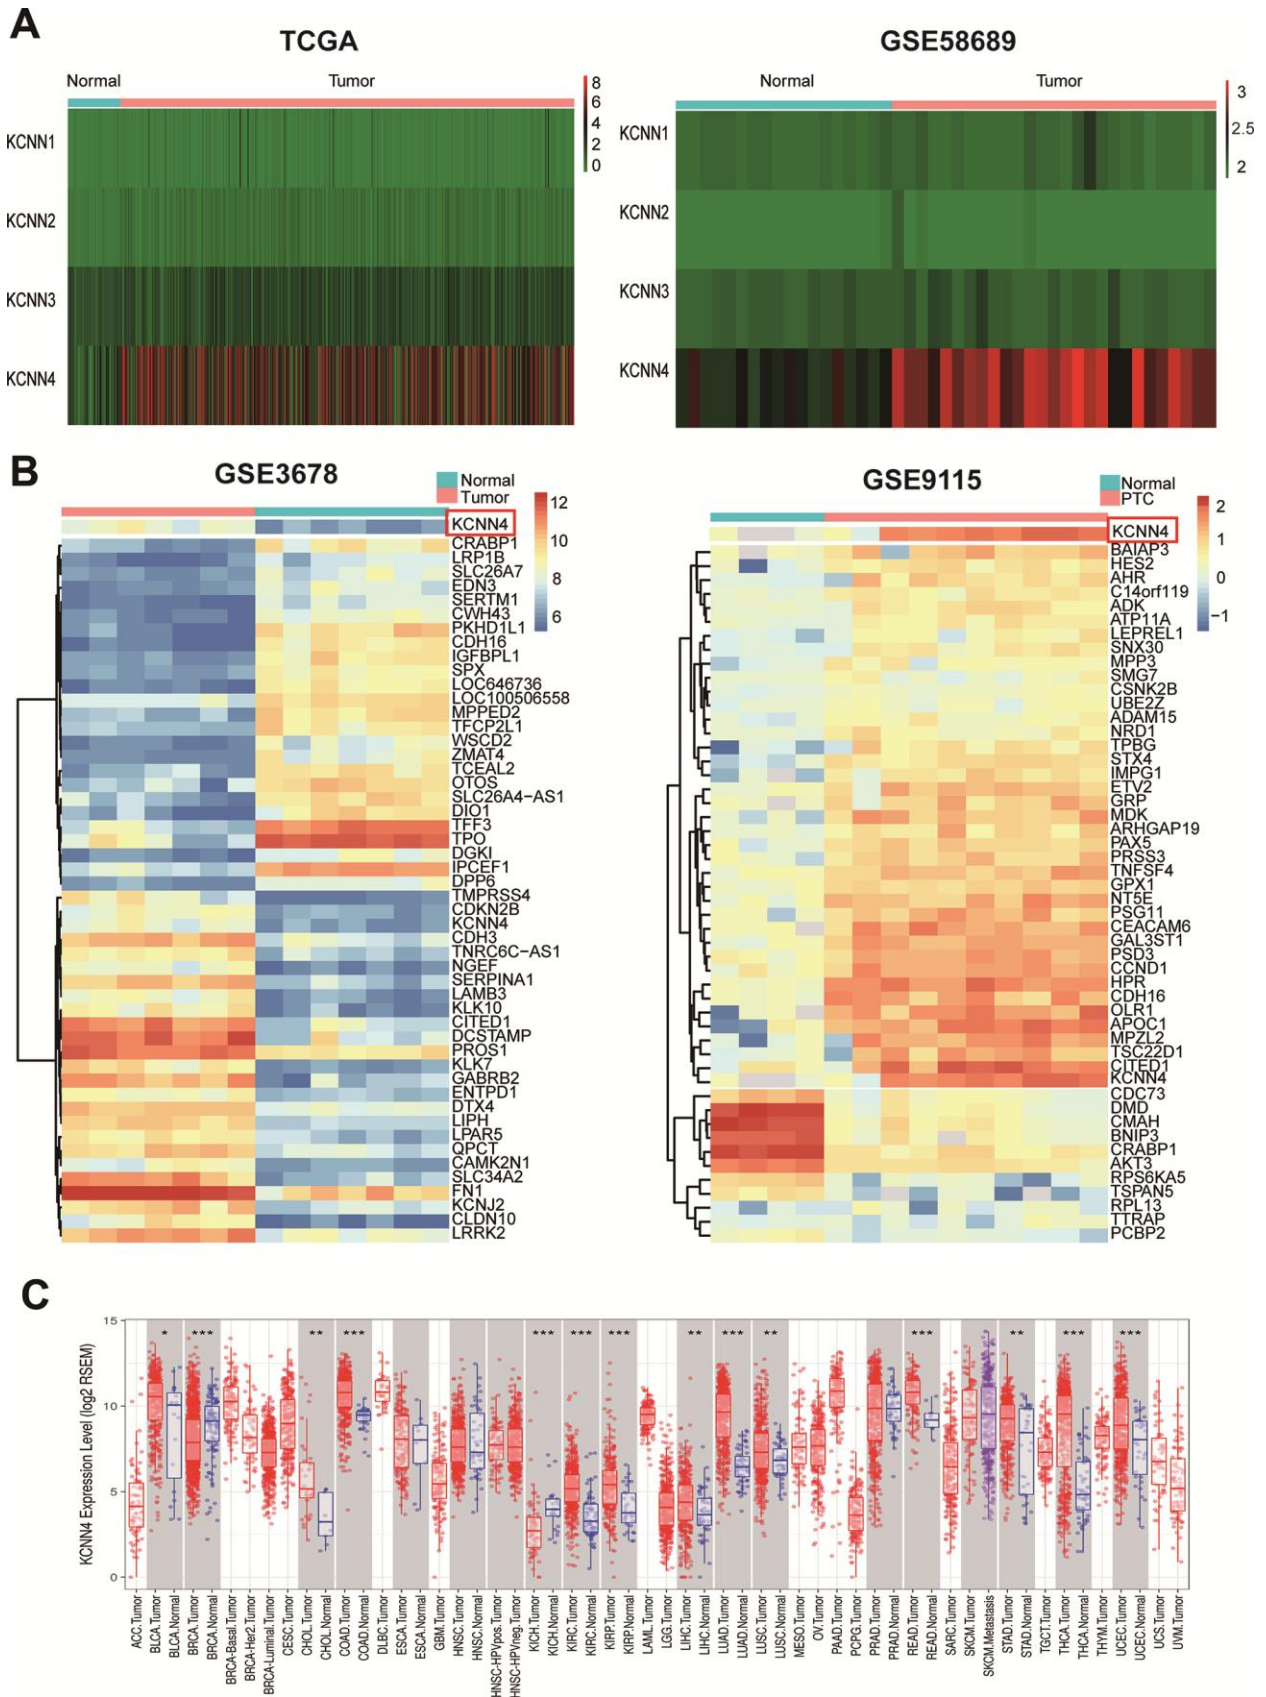

**Figure 1. *KCNN4* was differentially expressed in PTC and most other cancers. (A)** The expression of the *KCNN* family in PTC was assessed using data from TCGA and GSE58689. **(B)** Heatmap of the top 50 significantly differentially expressed genes in GSE3678 and

GSE9115, based on the adjusted p-value. (C) *KCNN4* was overexpressed in multiple cancers in TCGA. The statistical significance of differential expression was evaluated using the Wilcoxon test. \* $p < 0.05$ , \*\* $p < 0.01$ , \*\*\* $p < 0.001$ . ACC: Adrenocortical carcinoma; BLCA: Bladder urothelial carcinoma; BRCA: Breast invasive carcinoma; CESC: Cervical squamous cell carcinoma and endocervical adenocarcinoma; CHOL: Cholangiocarcinoma; COAD: Colon adenocarcinoma; DLBC: Lymphoid neoplasm diffuse large B-cell lymphoma; ESCA: Esophageal carcinoma; GBM: Glioblastoma multiforme; HNSC: Head and neck squamous cell carcinoma; KICH: Kidney chromophobe; KIRC: Kidney renal clear cell carcinoma; KIRP: Kidney renal papillary cell carcinoma; LAML: Acute myeloid leukemia; LGG: Brain lower grade glioma; LIHC: Liver hepatocellular carcinoma; LUAD: Lung adenocarcinoma; LUSC: Lung squamous cell carcinoma; MESO: Mesothelioma; OV: Ovarian serous cystadenocarcinoma; PAAD: Pancreatic adenocarcinoma; PCPG: Pheochromocytoma and paraganglioma; PRAD: Prostate adenocarcinoma; READ: Rectum adenocarcinoma; SARC: Sarcoma; SKCM: Skin cutaneous melanoma; STAD: Stomach adenocarcinoma; TGCT: Testicular germ cell tumor; THCA: Thyroid carcinoma; THYM: Thymoma; UCEC: Uterine corpus endometrial carcinoma; UCS: Uterine carcinosarcoma; UVM: Uveal melanoma.

based on the median *KCNN4* level. In the cohort from TCGA, higher *KCNN4* expression was associated with a higher T stage ( $p = 0.001$ ), a greater incidence of LNM ( $p < 0.0001$ ), a more advanced disease stage ( $p = 0.001$ ) and a higher frequency of the classical type ( $p < 0.0001$ ) (Table 1). In our validated cohort, *KCNN4* expression also correlated significantly with the tumor size ( $p = 0.028$ ), LNM ( $p < 0.030$ ) and disease stage ( $p = 0.009$ ) (Table 2).

Then we evaluated *KCNN4* expression in PTC patients with different tumor grades, stages, subtypes and mutations in TCGA. As illustrated in Figure 3A–3C, most patients with higher T stages, N stages and disease stages had higher mRNA levels of *KCNN4*. In a subtype analysis, *KCNN4* levels were significantly greater in the classical and columnar variant subtypes than in the follicular subtype (Figure 3D). We also divided patients according to their driver mutation status, and found that *KCNN4* expression was significantly greater in the *BRAF* mutation group (Figure 3E,  $p < 0.0001$ ), the *RAS* wild-type group (Figure 3F,  $p < 0.0001$ ) and the *RET* fusion group (Figure 3G,  $p < 0.0001$ ) than in their respective counterpart groups. *KCNN4* expression was also significantly greater in the *BRAF*-like group than in the *RAS*-like group (Figure 3H; *BRAF*-like:  $68.63 \pm 51.57$ , *RAS*-like:  $4.36 \pm 14.22$ ,  $p < 0.0001$ ). Thus, *KCNN4* expression was associated with many clinicopathological features of PTC.

### The upregulation of *KCNN4* increases the risk of LNM in PTC

To examine whether high *KCNN4* expression is a major risk factor for LNM in PTC, we constructed regression models using data from TCGA (Table 3). Univariate logistic regression demonstrated that high *KCNN4* expression (odds ratio [OR]=3.665, 95% confidence interval [CI]: 2.483-5.409,  $p < 0.001$ ), female (OR=0.640, 95% CI: 0.422-0.972,  $p = 0.036$ ), disease stage III/IV (OR=3.524, 95% CI: 2.336-5.316,  $p < 0.001$ ), T stage III/IV (OR=2.688, 95% CI: 1.830-3.970,  $p < 0.001$ ) and classical type (OR=2.370, 95% CI: 1.535-3.660,  $p < 0.001$ ) were associated with the risk of

LNM. Multivariate logistic regression indicated that high *KCNN4* expression (OR=2.914, 95% CI: 1.925-4.411,  $p < 0.001$ ), disease stage III/IV (OR=2.708, 95% CI: 1.656-4.428,  $p < 0.001$ ), T stage III/IV (OR=1.703, 95% CI: 1.054-2.753,  $p = 0.030$ ) and classical type (OR=2.506, 95% CI: 1.528-4.110,  $p < 0.001$ ) were associated with the risk of LNM, whereas gender was excluded from the model (OR=0.770, 95% CI: 0.482-1.229,  $p = 0.274$ ). These data indicated that elevated *KCNN4* expression increased the risk of LNM.

### The diagnostic and prognostic value of *KCNN4* in PTC patients

Next, we used receiver operating characteristic (ROC) curves to examine the diagnostic significance of *KCNN4* expression in TCGA, GSE58689 and our validated cohort. *KCNN4* expression distinguished between PTC tissues and normal tissues with an area under the ROC curve (AUC) of 81.4% (95% CI: 77.6-85.2%,  $p < 0.0001$ ) in TCGA, 93.5% (95% CI: 88.7-98.3%,  $p = 0.024$ ) in our validated cohort and 97.7% (95% CI: 94.4-100%,  $p < 0.0001$ ) in GSE58689 (Figure 4A). In TCGA, *KCNN4* also had diagnostic value for the T stage, with an AUC of 61.1% (95% CI: 55.9-66.3%,  $p < 0.0001$ ) (Figure 4B). For LNM, the AUC was 71.0% (95% CI: 66.2-75.8%,  $p < 0.0001$ ) in TCGA and 76.7% (95% CI: 61.7-91.7%,  $p = 0.003$ ) in our validated cohort (Figure 4C). The AUC for distinguishing tumor stage (I + II) / (III + IV) was 61.2% (95% CI: 56.0-66.5%,  $p < 0.0001$ ) in TCGA and 74.2% (95% CI: 59.4-89.1%,  $p = 0.011$ ) in our validated cohort (Figure 4D). These findings suggested that *KCNN4* expression may have diagnostic value for PTC patients.

To investigate the prognostic value of *KCNN4*, we performed a disease-free survival analysis using Kaplan-Meier curves from the Gene Expression Profiling Interactive Analysis (GEPIA) server. Higher *KCNN4* expression was associated with a greater risk of relapse or death (hazard ratio [HR]=1.7,  $p = 0.078$ ), especially in the *BRAF*-like subgroup (HR=2.3,  $p = 0.047$ ) (Figure 4E, 4F). Thus, *KCNN4* overexpression may predict a worse prognosis in PTC patients.

## KCNN4 overexpression is associated with immune cell infiltration

Previous studies have indicated that *KCNN4* can alter antigen presentation and various immune cell functions [30, 31]. Using TCGA data from the TIMER online tool, we explored the association between *KCNN4* expression and immune cell infiltration in PTC. *KCNN4* expression correlated positively with the levels of infiltrating B cells (Correlation=0.218,  $p<0.0001$ ), CD8+ T cells (Correlation=0.213,  $p<0.0001$ ), CD4+ T cells (Correlation=0.284,  $p<0.0001$ ), neutrophils (Correlation=0.485,  $p<0.0001$ ) and dendrites (Correlation=0.504,  $p<0.0001$ ) (Figure 4G).

## KCNN4 is overexpressed in PTC cell lines and promotes PTC cell proliferation

We then examined the mRNA levels of *KCNN4* in PTC and normal thyroid cell lines using qRT-PCR. *KCNN4* expression was markedly higher in TPC-1 ( $4.83 \pm 0.375$ ,  $p<0.0001$ ), KTC-1 ( $4.65 \pm 0.327$ ,  $p<0.0001$ ) and BCPAP ( $1.30 \pm 0.168$ ,  $p<0.01$ ) cells

than in normal HTORI-3 cells ( $0.198 \pm 0.025$ ) (Figure 5A). Next, we used small interfering RNA (siRNA) to knock down *KCNN4* (Si-*KCNN4*) in PTC cells. The siRNA reduced *KCNN4* mRNA levels by > 50% in all three PTC cell lines (Figure 5B,  $p<0.01$ ), and also significantly reduced *KCNN4* protein levels (Figure 5C).

Next, we assessed the effects of *KCNN4* on PTC cell proliferation. A Cell Counting Kit-8 (CCK-8) assay demonstrated that knocking down *KCNN4* reduced the proliferative capacity of PTC cells, particularly in the last 24 hours of measurement (Figure 5D,  $p<0.0001$ ). Additionally, a colony formation assay indicated that the downregulation of *KCNN4* attenuated the proliferative abilities of PTC-1 cells (negative control siRNA [Si-NC]:  $114.3 \pm 8.5$  colonies, Si-*KCNN4*:  $51.7 \pm 10.4$  colonies,  $p<0.01$ ), KTC-1 cells (Si-NC:  $165.0 \pm 9.6$  colonies, Si-*KCNN4*:  $55.0 \pm 8.9$  colonies,  $p<0.001$ ) and BCPAP cells (Si-NC:  $163.7 \pm 7.0$  colonies, Si-*KCNN4*:  $73.7 \pm 7.4$  colonies,  $p<0.001$ ) (Figure 5E). Thus, the downregulation of *KCNN4* inhibited the proliferation of PTC cell lines.

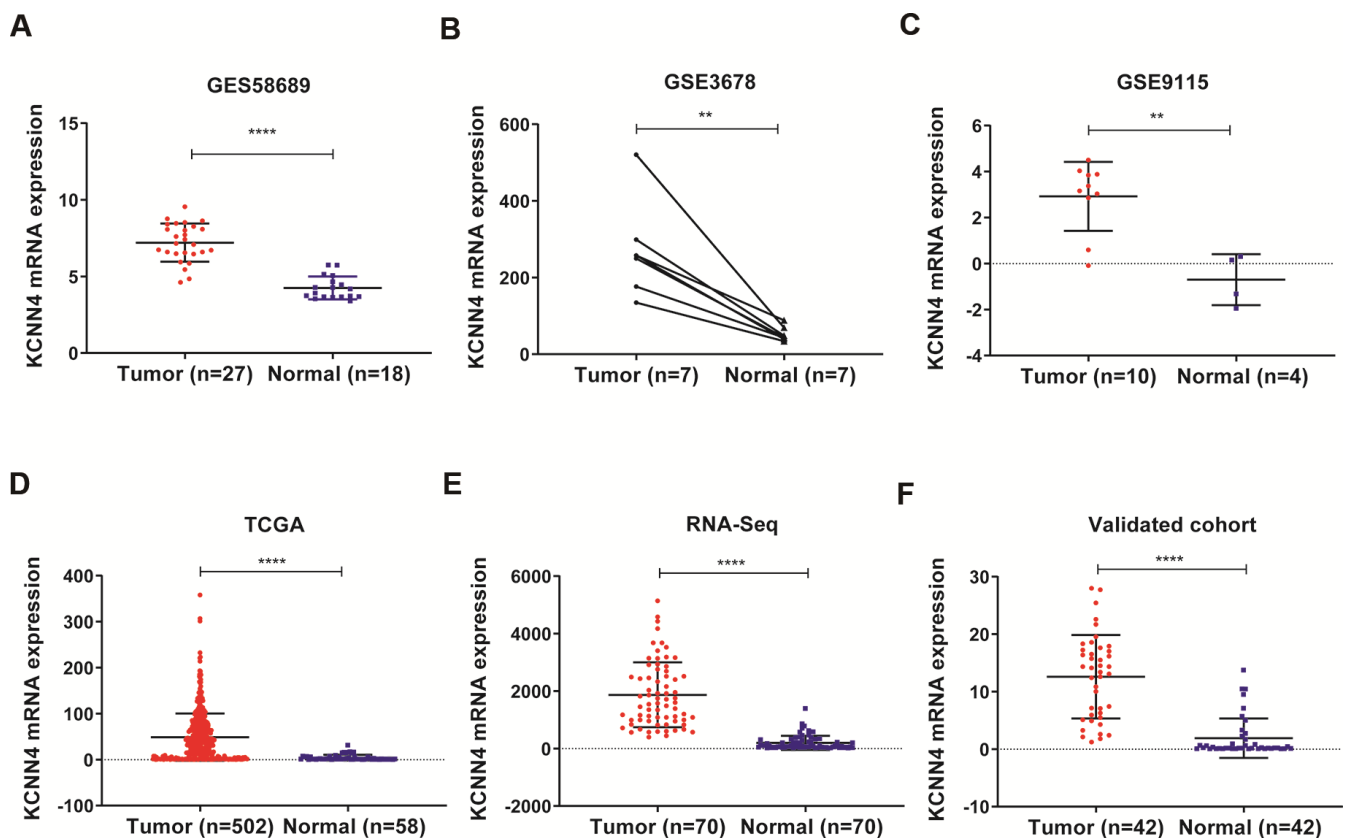

**Figure 2. *KCNN4* was overexpressed in PTC.** (A–D) *KCNN4* mRNA levels were greater in PTC tissues than in normal thyroid tissues in GSE58689, GSE3678, GSE9115 and TCGA. (E) *KCNN4* was upregulated in 70 PTC tissues compared with matched adjacent nontumorous thyroid tissues from our RNA sequencing dataset. (F) The overexpression of *KCNN4* in PTC was verified in our validated cohort using qRT-PCR. Statistical analyses were performed as follows: (A, C, D): Mann-Whitney test; (B): Paired t-test; (E, F): Wilcoxon test. \*\* $p<0.01$ , \*\*\*\* $p<0.0001$ .

**Table 1. Correlation between KCNN4 expression and clinicopathologic factors in the TCGA cohort.**

| Clinicopathologic factors | Patients | High expression | Low expression | p-value  |
|---------------------------|----------|-----------------|----------------|----------|
| Gender                    |          |                 |                |          |
| Female                    | 367      | 180             | 187            | 0.546    |
| Male                      | 135      | 71              | 64             |          |
| Age (years)               |          |                 |                |          |
| <60                       | 389      | 196             | 193            | 0.831    |
| ≥60                       | 113      | 55              | 58             |          |
| Histological type         |          |                 |                |          |
| Classical                 | 356      | 203             | 153            | <0.0001* |
| Other types               | 146      | 48              | 98             |          |
| Neoplasm focus type       |          |                 |                |          |
| Unifocal                  | 266      | 135             | 131            | 0.928    |
| Multifocal                | 226      | 113             | 113            |          |
| T stage                   |          |                 |                |          |
| I-II                      | 307      | 135             | 172            | 0.001*   |
| III-IV                    | 193      | 114             | 79             |          |
| Lymph node metastasis     |          |                 |                |          |
| Yes                       | 222      | 150             | 72             | <0.0001* |
| No                        | 229      | 83              | 146            |          |
| Disease stage(AJCC7)      |          |                 |                |          |
| I-II                      | 333      | 149             | 184            | 0.001*   |
| III-IV                    | 167      | 101             | 66             |          |
| New event                 |          |                 |                |          |
| Yes                       | 44       | 27              | 17             | 0.155    |
| No                        | 458      | 224             | 234            |          |

Note: \*p-value< 0.05.

Abbreviations: KCNN4, Potassium calcium-activated channel subfamily N member 4; TCGA, The Cancer Genome Atlas; AJCC7, American Joint Committee on Cancer 7th edition.

### **KCNN4 knockdown reduces the migration and invasion capacities of PTC cells**

Since *KCNN4* expression correlated with LNM in PTC, we performed Transwell migration assays, wound healing assays and Matrigel invasion assays to assess the impact of *KCNN4* on PTC cell migration and invasion. The migration and invasion abilities of TPC-1, KTC-1 and BCPAP cells transfected with Si-KCNN4 were significantly lower than those of cells transfected with Si-NC (Figure 6A, 6B). The number of migratory cells was as follows - TPC-1: Si-NC 213.7 ± 11.4, Si-KCNN4 81.7 ± 7.4,  $p<0.0001$ ; KTC-1: Si-NC 250.0 ± 9.0, Si-KCNN4 59.7 ± 6.8,  $p<0.0001$ ; BCPAP: Si-NC 122.7 ± 11.1, Si-KCNN4 65.7 ± 7.1,  $p<0.01$ . The number of invading cells was - TPC-1: Si-NC 141.0 ± 11.1, Si-KCNN4 42.3 ± 7.8,  $p<0.001$ ; KTC-1: Si-NC 193.0 ± 19.1, Si-KCNN4 32.7 ± 8.3,  $p<0.001$ ; BCPAP: Si-NC 114.3 ± 8.5, Si-KCNN4 16.3 ± 7.5,  $p<0.001$ . In the wound healing assay, 24 hours after the scratch, the migration rate was reduced to less than 40% of the

control value when *KCNN4* was downregulated (Figure 6C). These data indicated that *KCNN4* may promote tumor metastasis in PTC.

### **KCNN4 suppresses apoptosis and induces the epithelial-mesenchymal transition (EMT) in thyroid cancer cell lines**

Single Gene Set Enrichment Analysis (GSEA) was used to identify genes that may be regulated by *KCNN4* in PTC. Based on the median level of *KCNN4*, PTC patients from TCGA were divided into two groups. We discovered that genes involved in the EMT (FDR=0.006, Enrichment score=0.6437) and apoptosis (FDR=0.0056, Enrichment score=0.5776) were associated with *KCNN4* expression (Figure 7A, 7B). Therefore, we used flow cytometry to detect apoptosis in PTC cell lines after the downregulation of *KCNN4*. The apoptosis rate, calculated based on the total percentage of cells in the second and third quadrants, was higher in the *KCNN4*-knockdown group than in the

**Table 2. Correlation between KCNN4 expression and clinicopathologic factors in the validated cohort.**

| Clinicopathologic factors | Patients | High expression | Low expression | p-value |
|---------------------------|----------|-----------------|----------------|---------|
| Gender                    |          |                 |                |         |
| Female                    | 23       | 13              | 10             | 0.352   |
| Male                      | 19       | 8               | 11             |         |
| Age (years)               |          |                 |                |         |
| ≥55                       | 15       | 8               | 7              | 0.747   |
| <55                       | 27       | 13              | 14             |         |
| Tumor size (mm)           |          |                 |                |         |
| ≥10                       | 25       | 16              | 9              | 0.028*  |
| <10                       | 17       | 5               | 12             |         |
| Lymph node metastasis     |          |                 |                |         |
| Yes                       | 23       | 15              | 8              | 0.030*  |
| No                        | 19       | 6               | 13             |         |
| Neoplasm focus type       |          |                 |                |         |
| Multifocal                | 8        | 3               | 5              | 0.697   |
| Unifocal                  | 34       | 18              | 16             |         |
| Disease stage(AJCC7)      |          |                 |                |         |
| III+IV                    | 14       | 11              | 3              | 0.009*  |
| I+II                      | 24       | 10              | 18             |         |

Note: \*p-value< 0.05.

Abbreviations: KCNN4, Potassium calcium-activated channel subfamily N member 4; AJCC7, American Joint Committee on Cancer 7th edition.

control group in each cell line (TPC-1: Si-NC  $0.76 \pm 0.34$ , Si-KCNN4  $2.66 \pm 0.49$ ,  $p<0.05$ ; KTC-1: Si-NC  $2.14 \pm 0.20$ , Si-KCNN4  $4.05 \pm 0.07$ ,  $p<0.01$ ; BCPAP: Si-NC  $4.29 \pm 0.40$ , Si-KCNN4  $5.92 \pm 0.12$ ,  $p<0.05$ ) (Figure 7C).

Next, we quantified the mRNA and protein levels of several representative markers of the EMT and apoptosis in PTC cells. E-cadherin is an epithelial marker that suppresses tumor invasion, and its expression is negatively regulated by transcription factors such as Slug and Snail1 [32, 33]. Mesenchymal markers including Vimentin and N-cadherin are indicators of the EMT and cancer metastasis [34, 35]. The switch from E-cadherin to N-cadherin is an important hallmark of EMT induction [36]. We found that the downregulation of *KCNN4* reduced N-cadherin, Vimentin and Slug expression while elevating E-cadherin expression (Figure 7D, 7E).

The Bcl-2 gene family, which participates in mitochondrion-induced cellular apoptosis, includes both anti-apoptotic (Bcl-2 and Bcl-xl) and pro-apoptotic genes (Bax). Bax exerts pro-apoptotic effects by sequestering Bcl-2 or Bcl-xl in the form of a heterodimer [37]. In our study, the downregulation of *KCNN4* enhanced Bax expression and reduced Bcl-2 and Bcl-xl expression (Figure 7F, 7G). These results

demonstrated that *KCNN4* promotes the EMT and hinders apoptosis in PTC.

## DISCUSSION

TC has the fifth highest incidence rate of all cancers in women, following breast, lung, colorectal and uterine cancer [2]. Although patients with low-risk TC have a relatively good prognosis, those who experience recurrence or distant metastasis have a higher risk of death. Therefore, identifying high-risk patients is a crucial task for clinicians. To this end, it is indispensable to delineate the mechanisms of PTC and further mine the biomarkers for risk stratification. Numerous studies have demonstrated that membrane ion channels regulate cell proliferation, apoptosis and migration in various cancers, and thus can serve as prognostic biomarkers and therapeutic targets [38–40]. There is much evidence about the vital functions of ion channels in PTC, as well [26, 41].

*KCNN4*, a member of the KCNN family, encodes a potassium ion channel activated by calcium influx. The cancer-promoting effects of *KCNN4* have been observed in various cancers. For example, *KCNN4* is highly expressed in triple-negative breast cancer and was found to promote the migration and EMT of triple-negative breast cancer cells [42]. In hepatocellular

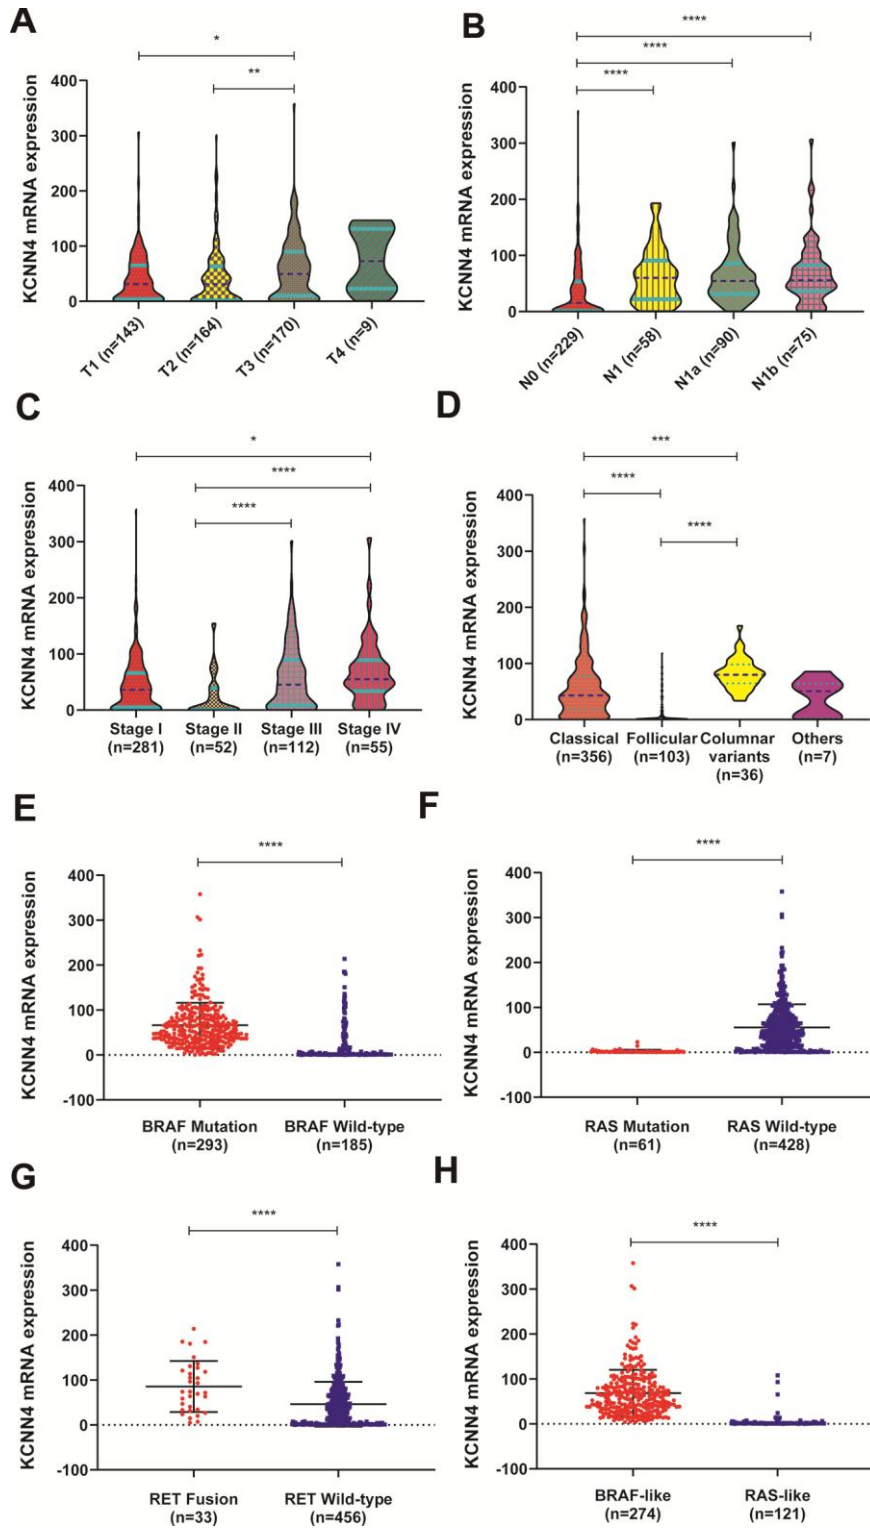

**Figure 3. The relationship between *KCNN4* expression and clinicopathological characteristics of PTC. (A–C) *KCNN4* expression varied according to the T stage, N stage and tumor stage. Higher *KCNN4* expression tended to be associated with worse clinicopathological features. (D) The expression of *KCNN4* in different subtypes of PTC. *KCNN4* was significantly upregulated in the columnar variant subtype and the classical subtype compared to the follicular subtype. (E) *KCNN4* expression was significantly higher in the *BRAF* mutation group than in the *BRAF* wild-type group. (F) *KCNN4* expression was significantly higher in the *RAS* wild-type group than in the *RAS* mutation group. (G) *KCNN4* expression was significantly higher in the *RET* fusion group than in the *RET* wild-type group. (H) *KCNN4* expression was higher in the *BRAF*-like group than in the *RAS*-like group. Statistical analyses were performed as follows: A–D: Kruskal-Wallis test; E–H: Mann-Whitney test. \* $p < 0.05$ , \*\* $p < 0.01$ , \*\*\* $p < 0.001$ , \*\*\*\* $p < 0.0001$ .**



**Table 3. Univariate and multivariate logistic regression for the risk of lymph node metastasis in the TCGA cohort.**

| Factors                                  | Univariate analysis |             |         | Multivariate analysis |             |         |
|------------------------------------------|---------------------|-------------|---------|-----------------------|-------------|---------|
|                                          | OR                  | 95% CI      | p-value | OR                    | 95% CI      | p-value |
| KCNN4 expression (high vs. low)          | 3.665               | 2.483-5.409 | <0.001* | 2.914                 | 1.925-4.411 | <0.001* |
| Age (>60 vs. <60)                        | 0.653               | 0.416-1.024 | 0.063   | -                     | -           | -       |
| Gender (female vs. male)                 | 0.640               | 0.422-0.972 | 0.036*  | 0.770                 | 0.482-1.229 | 0.274   |
| Disease stage (III,IV vs. I,II)          | 3.524               | 2.336-5.316 | <0.001* | 2.708                 | 1.656-4.428 | <0.001* |
| T stage (III,IV vs. I,II)                | 2.688               | 1.820-3.970 | <0.001* | 1.703                 | 1.054-2.753 | 0.03*   |
| New event                                | 1.893               | 0.974-3.678 | 0.060   | -                     | -           | -       |
| Neoplasm focus type (Mul vs. Uni)        | 1.433               | 0.985-2.086 | 0.060   | -                     | -           | -       |
| Histological type (classical vs. others) | 2.370               | 1.535-3.660 | <0.001* | 2.506                 | 1.528-4.110 | <0.001* |

Note: \*p-value< 0.05.

Abbreviations: KCNN4, Potassium calcium-activated channel subfamily N member 4; TCGA, The Cancer Genome Atlas; OR, Odds ratio; CI, Confidence interval.

carcinoma, *KCNN4* promoted invasion and metastasis *in vitro* by inducing the MAPK/ERK and EMT pathways [43, 44]. Rabjerg et al. reported that high *KCNN4* expression was associated with poor survival and a high metastasis potential in clear cell renal carcinoma [45]. However, the involvement of *KCNN4* in TC has not been known.

In the present study, we first found that *KCNN4* was highly upregulated in PTC tissues compared to normal thyroid tissues in public databases. We then examined *KCNN4* mRNA levels using our own RNA sequencing data and a validated cohort including 42 matched PTC and adjacent normal tissues. The results were consistent with those of the bioinformatics analysis. Previous studies have demonstrated that high *KCNN4* expression is associated with malignant features and poor prognoses in various cancers [28, 45]. When we investigated the correlation between *KCNN4* expression and clinicopathological factors in PTC, we found that patients with higher *KCNN4* levels had a higher T stage, a greater incidence of LNM and more advanced disease stages than patients with lower *KCNN4* levels. The expression of *KCNN4* varied among patients with different PTC subtypes and driver mutation statuses, as it was elevated in patients with the columnar variant and classical types, as well as in those with *BRAF* mutations, *RET* fusion and wild-type *RAS*. Regression analysis indicated that *KCNN4* overexpression was an independent predictor of LNM in PTC. In addition, ROC curve analysis indicated that *KCNN4* expression could distinguish PTC tissues from normal tissues. Patients with higher *KCNN4* levels also had worse disease-free survival than those with lower levels, and this effect was especially pronounced in the *BRAF*-like group, whose *KCNN4* levels were significantly greater than those of the *RAS*-like group. These results

suggested that *KCNN4* is a potential biomarker for PTC.

Interestingly, we found a positive association between *KCNN4* expression and immune infiltration in PTC patients in TCGA. This finding was consistent with previous data indicating that *KCNN4* enhance migration capacity of dendritic cells and positively regulate antigen presentation [46]. Chimote et al. reported that activation of *KCNN4* channel could improve immune surveillance and the response to immune therapies in cancer [31]. It has also been reported that *KCNN4* blockers can ameliorate autoimmune disorders and inflammation [47]. Some studies have indicated that LNM is more common in PTC patients with thyroid autoimmunity than in those without [48–50]. Thus, we speculate that *KCNN4* may be a valuable therapeutic target for PTC patients with coexistent thyroid autoimmunity. However, further experiments are needed to confirm this hypothesis.

Our loss-of-function study demonstrated that *KCNN4* promotes proliferation, migration and invasion while inhibiting apoptosis in PTC cell lines. GSEA demonstrated the statistically significant enrichment of gene signatures associated with apoptosis and EMT. Extensive studies have shown that the EMT is associated with tumor initiation, progression, stemness, migration and resistance in various cancers [35]. Vasko et al. reported that the EMT was a common phenomenon in PTC metastasis, and that Vimentin promoted the EMT in thyroid cancer cell lines [51]. Another hallmark of cancer cells is their evasion of apoptosis [52]. Certain transcription factors and other proteins involved in the EMT have been reported to facilitate tumor survival by hindering apoptosis [53]. For example, proteins in the Snail family not only

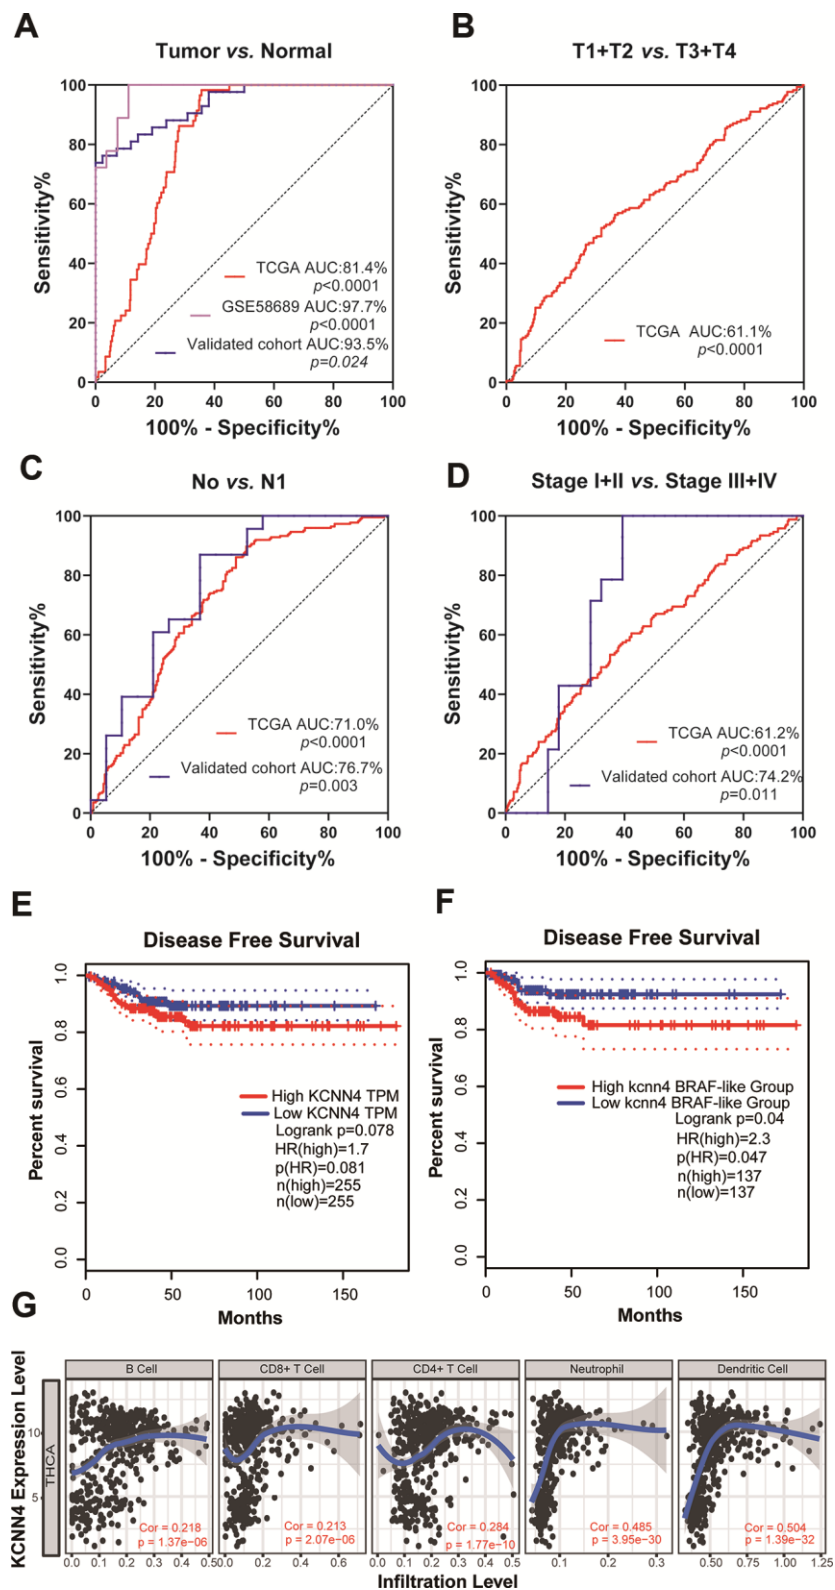

**Figure 4. The upregulation of *KCNN4* served as a prognostic and diagnostic biomarker in PTC.** (A) ROC curve analysis demonstrated that *KCNN4* could distinguish PTC from nontumorous tissues in TCGA, GSE58689 and our validated cohort. (B) Diagnostic value of *KCNN4* expression for the T stage in TCGA. (C, D) ROC curve analysis depicting *KCNN4* expression against the N stage and tumor stage in TCGA and our validated cohort. (E, F) Kaplan-Meier analyses of disease-free survival based on low and high *KCNN4* expression in PTC patients and the BRAF-like group from TCGA. (G) *KCNN4* expression was associated with immune infiltration in TCGA. THCA: Thyroid carcinoma; Cor: Correlation.

induce the EMT, but also promote survival and cell movement [54]. On the other hand, Wu and Tang reported that Bcl-2, an anti-apoptotic protein, is also an important inducer of the EMT [55]. Thus, there seems to be crosstalk between the EMT and apoptosis in the progression of cancer. Our study demonstrated that silencing *KCNN4* elevated the expression of E-cadherin and Bax but reduced the expression of N-cadherin, Vimentin, Slug, Bcl-2 and Bcl-xl. These results indicated that *KCNN4* may promote the EMT and inhibit apoptosis in PTC.

Our study had several shortcomings. First, we did not validate our results *in vivo*. Second, the crosstalk between the EMT and apoptosis in *KCNN4*-induced PTC progression requires further exploration. Finally, to increase the clinical significance of our findings, further experiments are needed to explore the effects of *KCNN4* blockers on PTC.

In summary, we found that *KCNN4* was overexpressed in PTC and was a valuable diagnostic and prognostic marker. Silencing of *KCNN4* hindered the progression

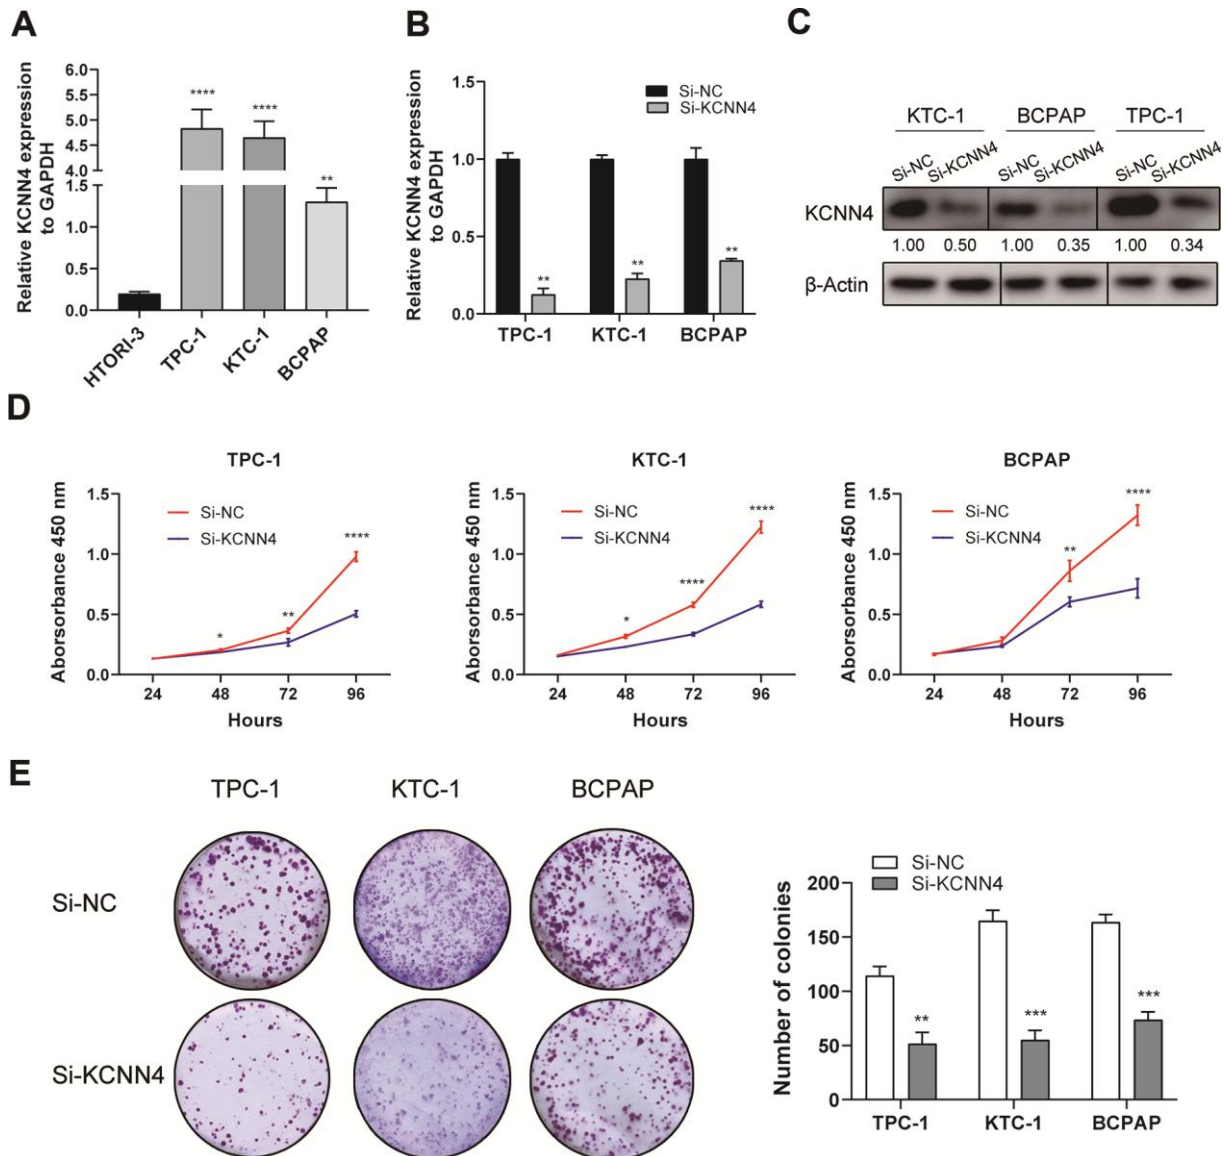

**Figure 5. *KCNN4* was upregulated in PTC cell lines and promoted their proliferation *in vitro*.** (A) The relative expression of *KCNN4* in PTC cell lines (compared with *GAPDH*). *KCNN4* was upregulated in three PTC cell lines (KTC-1, TPC-1 and BCPAP) compared to the normal thyroid cell line HTORI-3. (B) *KCNN4* expression was lower in the Si-KCNN4 group than in the Si-NC group in the three PTC cell lines. (C) *KCNN4* protein expression was lower in the Si-KCNN4 group than in the Si-NC group. (D, E) CCK-8 assays and colony formation assays in the three PTC cell lines. Two-way analysis of variance was used to analyze the CCK-8 assay data, and Student's t-test was used for the others. \* $p < 0.05$ , \*\* $p < 0.01$ , \*\*\* $p < 0.001$ , \*\*\*\* $p < 0.0001$ .

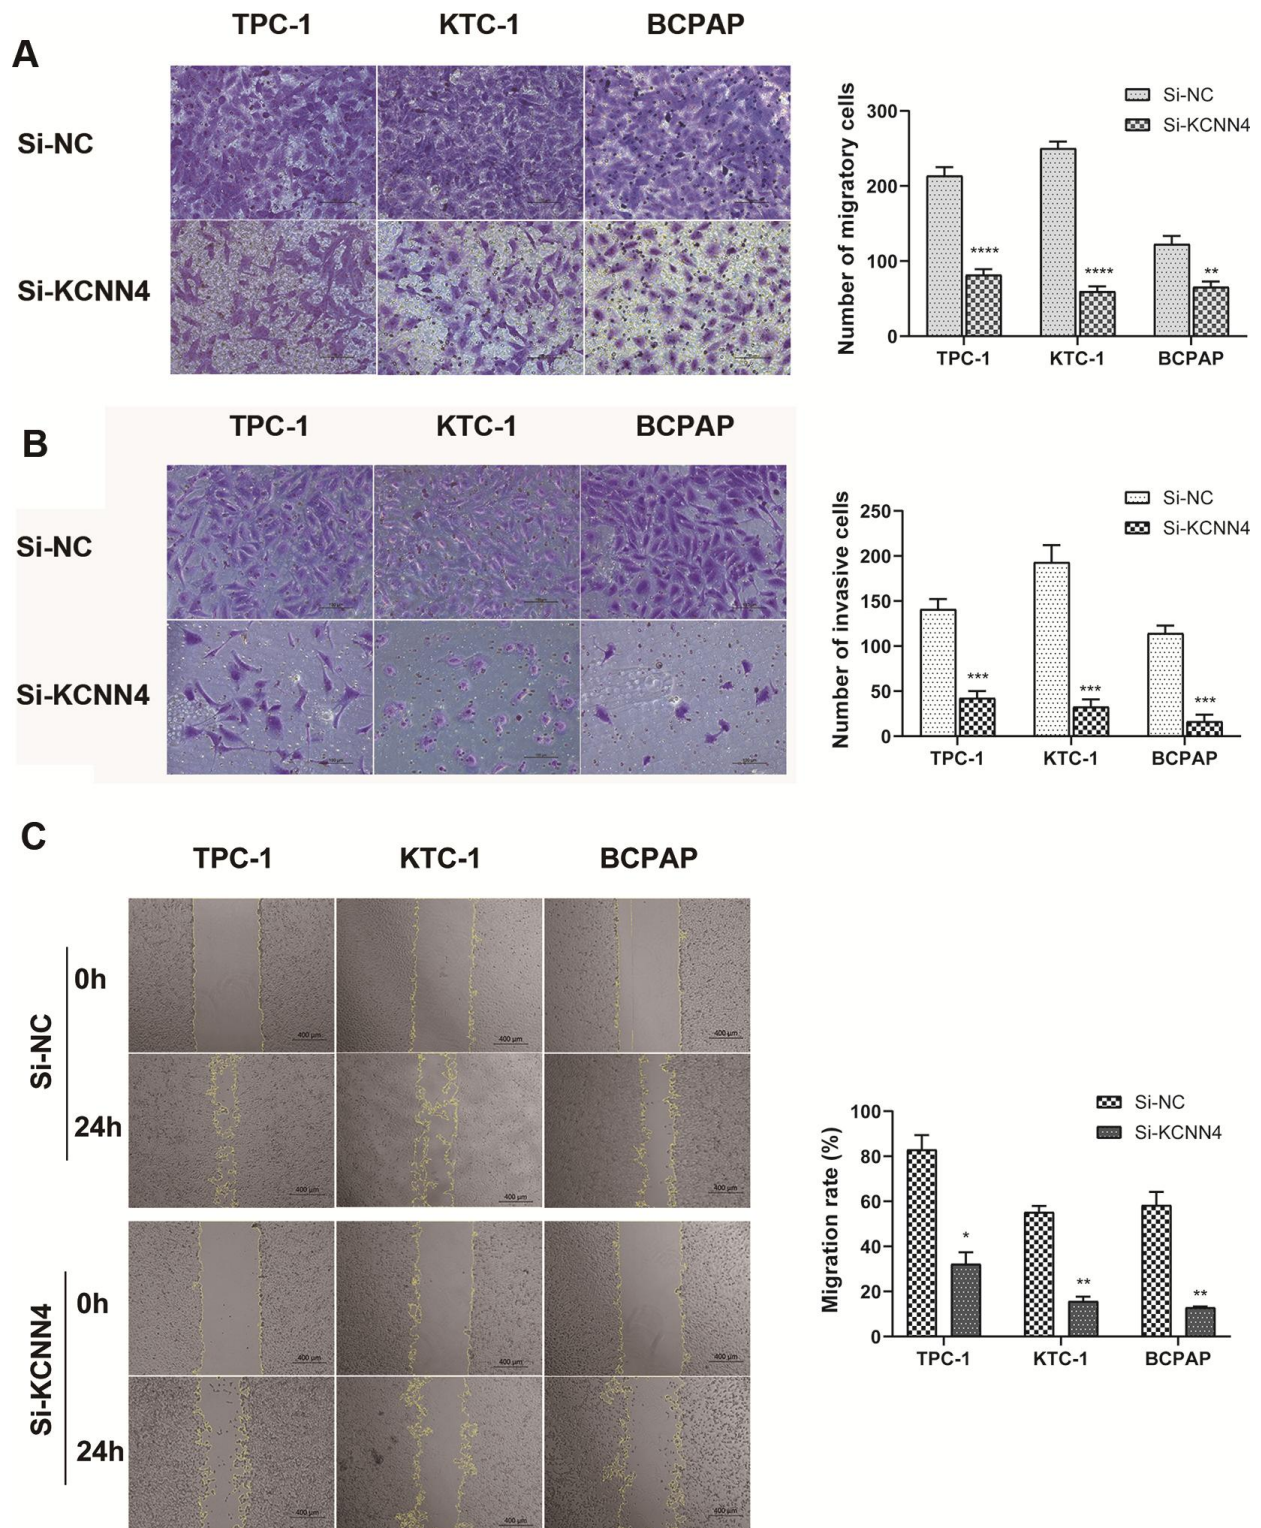

**Figure 6. Downregulation of *KCNN4* inhibited the migration and invasion of PTC cell lines.** (A, B) Transwell migration and Matrigel invasion assays in the *KCNN4*-knockdown group and the corresponding control group in three PTC cell lines. The quantitative results of the migration and invasion assays were determined from five random fields. (C) A wound-healing assay indicated that downregulating *KCNN4* reduced the migration abilities of PTC cell lines. The data came from at least two independent experiments. \* $p < 0.05$ , \*\* $p < 0.01$ , \*\*\* $p < 0.001$ , \*\*\*\* $p < 0.0001$  in comparison with the Si-NC group using Student's t-test.

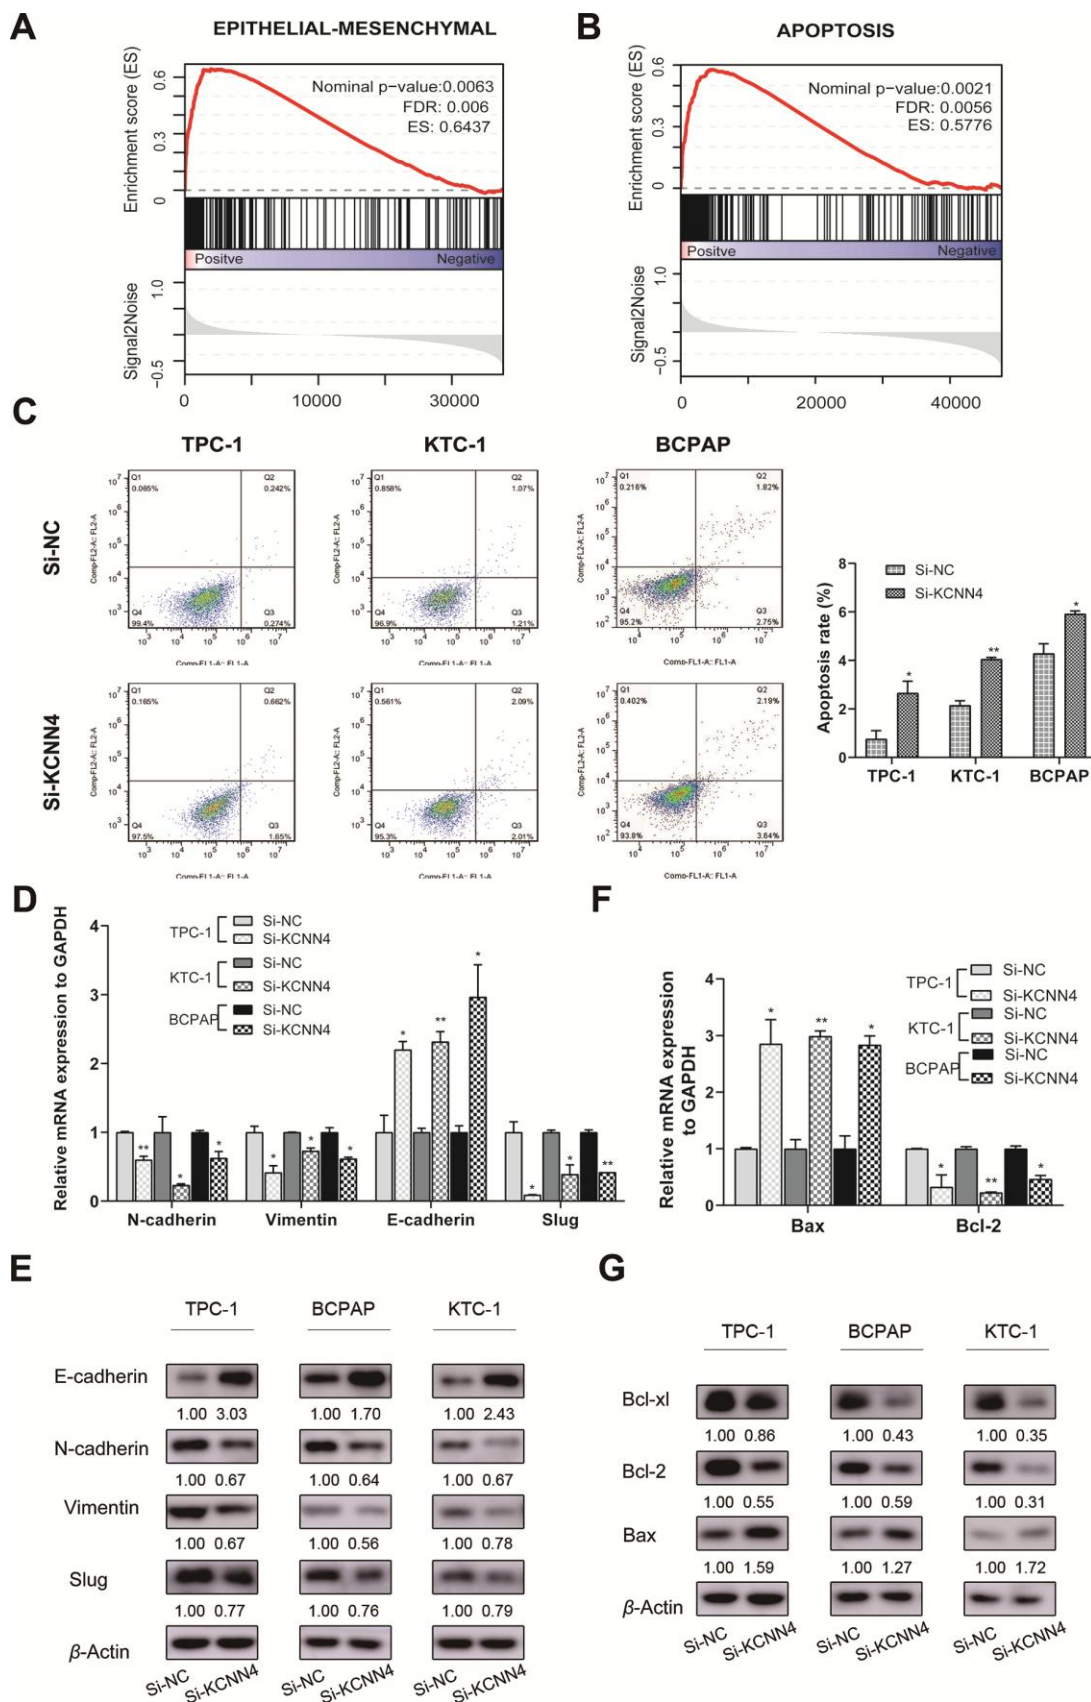

**Figure 7. The downregulation of *KCNN4* prevented the EMT while promoting apoptosis in PTC cell lines. (A, B) Single GSEA based on data from TCGA demonstrated that *KCNN4* was associated with the EMT and apoptosis. (C) Silencing *KCNN4* promoted apoptosis in**

PTC cell lines. (D, E) Silencing *KCNN4* upregulated E-cadherin and downregulated N-cadherin, Vimentin and Slug at the mRNA and protein levels. (F) qRT-PCR demonstrated that downregulating *KCNN4* enhanced *Bax* expression but reduced *Bcl-2* expression. (G) Western blotting assays revealed that downregulating *KCNN4* increased Bax expression and reduced Bcl-2 and Bcl-xl expression at the protein level. \* $p < 0.05$  and \*\* $p < 0.01$  in comparison with the Si-NC group using Student's t-test.

of PTC cell lines. Thus, *KCNN4* is a potential therapeutic target in PTC.

## MATERIALS AND METHODS

### Bioinformatics

Public microarray datasets (GSE58689 [56], GSE9115 [57], GSE3678) including 44 PTC tissues and 29 nontumorous tissues were downloaded from the Gene Expression Omnibus (<https://www.ncbi.nlm.nih.gov/geo/>). Transcriptome sequencing data from 502 PTC samples and 58 normal thyroid tissues, along with the corresponding clinical data, were obtained from the thyroid cancer database of TCGA (<https://www.cancer.gov/about-nci/organization/ccg/research/structural-genomics/tcga/studied-cancers/thyroid>). R software (<https://bioconductor.org/biocLite.R>) was used to preprocess the data and investigate the differentially expressed genes. Differentially expressed genes in the microarray datasets were identified using the Limma package, with screening conditions of an adjusted  $p$ -value  $< 0.05$  and a  $\log_2[\text{fold change}] \geq 2$ . The heatmap was clustered using a Pearson correlation metric.

Pan-cancer analysis and immune infiltration evaluation were performed using the TIMER database (<https://cistrome.shinyapps.io/timer/>) [58]. Kaplan-Meier plots for disease-free survival were downloaded from the online database GEPIA (<http://gepia.cancer-pku.cn>) [59]. Single GSEA between the low and high *KCNN4* expression groups in TCGA was conducted using GSEA software (GSEA v3.0, <http://www.broadinstitute.org/gsea>) [60].

### Tissue samples

Forty-two matched pairs of PTC tissues and adjacent nontumorous tissues (patient age range: 16-72 years; male/female: 1/2) were dissected in the Department of Thyroid and Breast Surgery at The First Affiliated Hospital of Wenzhou Medical University (Wenzhou, Zhejiang, China) in 2018. After excision, the samples were instantly plunged into liquid nitrogen and frozen at  $-80\text{ }^\circ\text{C}$  for long-term storage. Each specimen was histologically analyzed by three pathologists. Written informed consent was obtained from each patient. The clinical data were collected legally under protocols developed by the Committee for Medical Research

Ethics of the First Affiliated Hospital of Wenzhou Medical University.

RNA sequencing data from 70 pairs of PTC tissues and matched adjacent nontumorous tissues were derived from our unpublished data.

### Cell culture

Human PTC cell lines (TPC-1, KTC-1 and BCPAP) were provided by Prof. Mingzhao Xing of the Johns Hopkins University School of Medicine (Baltimore, MD, USA). The normal human thyroid cell line (HTORI-3) was purchased from the Cell Bank of the Shanghai Chinese Academy of Sciences (Shanghai, China). The research resource identification number is CVCL\_6298 for TPC-1, CVCL\_6300 for KTC-1, CVCL\_0153 for BCPAP and CVCL\_4W02 for HTORI-3. The cells were cultured in RPMI 1640 medium containing 10% fetal bovine serum (Gibco, Invitrogen, Carlsbad, CA, USA) and 1% penicillin/streptomycin (Solarbio, Beijing, China) at  $37\text{ }^\circ\text{C}$  under 5%  $\text{CO}_2$ .

### Cell transfection

SiRNAs (si-*KCNN4* and si-NC) were designed and supplied by Gene Pharma (Shanghai, China). Cells were seeded in six-well plates one day before transfection (TPC-1, BCPAP: 60,000 cells per well; KTC-1: 80,000 cells per well). The siRNA was introduced into the cells using Lipofectamine RNAiMAX (Invitrogen, Grand Island, NY, USA) (siRNA:iMAX = 7.5  $\mu\text{L}$ :3  $\mu\text{L}$ ). After seven hours, the medium was replaced. The cells were used after 48 hours for further experiments. The sequence of the *KCNN4*-targeted siRNA was as follows: *KCNN4*-homo-1481 sense 5'-GGGAACAAGUGAACUCCAUTT-3'/antisense 5'-AUGGAGUUCACUUGUUCCTT-3'.

### RNA isolation, reverse transcription and qRT-PCR

Total RNA was extracted using TRIzol reagent (Thermo Fisher Scientific, Waltham, MA, USA), and reverse transcription was performed with a ReverTra Ace qPCR RT Kit (Toyobo, Osaka, Japan). The qRT-PCR was performed using a SYBR Premix Ex Taq II kit (RR820A, TaKaRa, Dalian, China) on an Applied Biosystems 7500 Real-Time PCR System. The mRNA expression relative to *GAPDH* expression was calculated using the  $2^{-\Delta\Delta\text{Ct}}$  method. All measurements were performed according to

standard protocols. The primers used in this study are shown in Supplementary Table 1 (Generay, Shanghai, China; Sangon, Shanghai, China).

### Cell proliferation assays

Cell viability was measured with a CCK-8 assay and a colony formation assay. TPC-1 cells (1,250 per well), KTC-1 cells (1,500 per well) and BCPAP cells (1,500 per well) were plated into 96-well plates. The cells were incubated with the CCK-8 reagent (Beyotime Biotechnology, Shanghai, China) for three hours (10  $\mu$ L per well). Detection was performed at an absorbance of 450 nm on four consecutive days. For the colony formation assay, cells were seeded in six-well plates in the same numbers described above. At least five days later ( $> 50$  cells/colony and  $> 30$  colonies), colonies were fixed with 4% paraformaldehyde and stained with 0.1% crystal violet. Photos were taken under bright light. The experiments were carried out three times.

### Migration and invasion analysis

Cells were collected 48 hours after transfection and seeded (35,000 cells per well) into the upper chamber of a Transwell plate (#3422, Corning, NY, USA) with serum-free medium. The lower chamber was filled with 600  $\mu$ L of medium containing 10% fetal bovine serum. After 22 hours, the cells that had migrated to the lower side of the membrane were fixed with 4% paraformaldehyde and stained with 0.1% crystal violet. Cells in five random visual fields from each chamber were imaged and counted under a microscope at  $\times 20$  magnification. A Matrigel invasion chamber (#354480, Corning Biocoat, Corning) was used with the same protocol to evaluate cellular invasion.

For the scratch wound assay, transfected cells were cultured under serum-free conditions at a density of  $2 \times 10^5$  cells per well in 24-well plates. A pipette tip was used to scratch the middle of each plate. Five fixed points were imaged at  $\times 5$  magnification before and after scratching. The migration rate (%) was calculated as (original wound area – 24-hour wound area) / original wound area  $\times 100\%$ . All experiments were performed at least three times.

### Flow cytometry analysis

Cell apoptosis was detected with an Annexin V-fluorescein isothiocyanate (FITC) apoptosis kit (#556547; Becton, Dickinson and Company, Franklin Lakes, NJ, USA) according to the manufacturer's instructions. Cells were collected and washed three times with phosphate-buffered saline. Next, 500  $\mu$ L of  $1 \times$  binding buffer was used to resuspend the cells, and

the cell suspension was dyed successively with Annexin V-FITC for 15 min and propidium iodide (PI) for 5 min in the dark. A flow cytometer (BD Biosciences Accuri C6; Becton, Dickinson and Company) and FlowJo software (FlowJo, Ashland, OR, USA) were used to analyze the cells. The Annexin V- / PI+, Annexin V+ / PI+, Annexin V+ / PI- and Annexin V- / PI- populations corresponded to necrotic cells (quadrant 1), late apoptotic cells (quadrant 2), early apoptotic cells (quadrant 3) and viable cells (quadrant 4), respectively.

### Western blotting

Total protein was extracted using radio-immunoprecipitation assay buffer (Solarbio) and protease inhibitors (Solarbio), and was measured with a bicinchoninic acid assay (Thermo Scientific, USA). The protein lysates were mixed with loading buffer and separated by 8-10% sodium dodecyl sulfate polyacrylamide gel electrophoresis (BioRad, Berkeley, CA, USA) at 80-120 V, and transferred to poly-vinylidene difluoride membranes (EMD Millipore, Billerica, MA, USA) at 300 mA. After being blocked with 5% non-fat dried milk for two hours, the membranes were incubated with primary antibodies at 4  $^{\circ}$ C overnight. The antibodies used in this research are shown in Supplementary Table 2. Next, the blots were incubated with horseradish peroxidase-conjugated anti-rabbit or anti-mouse IgG (1:5000) secondary antibodies (Abcam, Cambridge, UK) at room temperature for two hours. Finally, proteins were visualized using an enhanced chemiluminescence (Thermo Scientific) detection system, and the images were analyzed with ImageJ software (NIH, Bethesda, MD, USA). Every experiment was repeated independently at least twice.

### Statistical analysis

Statistical analyses were performed using SPSS 22.0 software (IBM SPSS Inc, Chicago, IL, USA) and GraphPad Prism 8 software (GraphPad, San Diego, CA, USA). ROC curves were applied to evaluate the diagnostic efficacy of *KCNN4*. Kaplan-Meier curves were used to evaluate the impact of *KCNN4* expression on disease-free survival. Clinicopathological parameters were assessed using the  $\chi^2$  test. The Shapiro-Wilk normality test ( $\alpha = 0.05$ ) was used to evaluate the data distribution. Normally distributed data were compared using Student's t-test, while non-normally distributed data were analyzed using non-parametric tests (the Kruskal-Wallis test, Mann-Whitney test or Wilcoxon rank-sum test). Two-way analysis of variance was used for the CCK-8 assay. The results are presented as the mean  $\pm$  standard deviation, and *p*-values  $< 0.05$  were considered to be significant.

## CONFLICTS OF INTEREST

The authors of this study declare that they have no conflicts of interest.

## FUNDING

This work was funded by the Natural Science Foundation of Zhejiang Province (LGF18H160031, LY18H160053) and the Science and Technology Planning Project of Wenzhou (Y20170740).

## REFERENCES

1. Lim H, Devesa SS, Sosa JA, Check D, Kitahara CM. Trends in thyroid cancer incidence and mortality in the United States, 1974-2013. *JAMA*. 2017; 317:1338-48.  
<https://doi.org/10.1001/jama.2017.2719>  
PMID:[28362912](https://pubmed.ncbi.nlm.nih.gov/28362912/)
2. Siegel RL, Miller KD, Jemal A. Cancer statistics, 2020. *CA Cancer J Clin*. 2020; 70:7-30.  
<https://doi.org/10.3322/caac.21590>  
PMID:[31912902](https://pubmed.ncbi.nlm.nih.gov/31912902/)
3. Carling T, Udelsman R. Thyroid cancer. *Annu Rev Med*. 2014; 65:125-37.  
<https://doi.org/10.1146/annurev-med-061512-105739>  
PMID:[24274180](https://pubmed.ncbi.nlm.nih.gov/24274180/)
4. Schneider DF, Chen H. New developments in the diagnosis and treatment of thyroid cancer. *CA Cancer J Clin*. 2013; 63:374-94.  
<https://doi.org/10.3322/caac.21195>  
PMID:[23797834](https://pubmed.ncbi.nlm.nih.gov/23797834/)
5. Wada N, Suganuma N, Nakayama H, Masudo K, Rino Y, Masuda M, Imada T. Microscopic regional lymph node status in papillary thyroid carcinoma with and without lymphadenopathy and its relation to outcomes. *Langenbecks Arch Surg*. 2007; 392:417-22.  
<https://doi.org/10.1007/s00423-007-0159-4>  
PMID:[17562092](https://pubmed.ncbi.nlm.nih.gov/17562092/)
6. Sampson E, Brierley JD, Le LW, Rotstein L, Tsang RW. Clinical management and outcome of papillary and follicular (differentiated) thyroid cancer presenting with distant metastasis at diagnosis. *Cancer*. 2007; 110:1451-56.  
<https://doi.org/10.1002/cncr.22956>  
PMID:[17705176](https://pubmed.ncbi.nlm.nih.gov/17705176/)
7. Shaha AR, Shah JP, Loree TR. Differentiated thyroid cancer presenting initially with distant metastasis. *Am J Surg*. 1997; 174:474-6.  
[https://doi.org/10.1016/s0002-9610\(97\)00158-x](https://doi.org/10.1016/s0002-9610(97)00158-x)  
PMID:[9374217](https://pubmed.ncbi.nlm.nih.gov/9374217/)
8. Haq M, Harmer C. Differentiated thyroid carcinoma with distant metastases at presentation: prognostic factors and outcome. *Clin Endocrinol (Oxf)*. 2005; 63:87-93.  
<https://doi.org/10.1111/j.1365-2265.2005.02304.x>  
PMID:[15963067](https://pubmed.ncbi.nlm.nih.gov/15963067/)
9. Shaha A. Treatment of thyroid cancer based on risk groups. *J Surg Oncol*. 2006; 94:683-91.  
<https://doi.org/10.1002/jso.20697>  
PMID:[17131422](https://pubmed.ncbi.nlm.nih.gov/17131422/)
10. Xing M, Alzahrani AS, Carson KA, Shong YK, Kim TY, Viola D, Elisei R, Bendlová B, Yip L, Mian C, Vianello F, Tuttle RM, Robenshtok E, et al. Association between BRAF V600E mutation and recurrence of papillary thyroid cancer. *J Clin Oncol*. 2015; 33:42-50.  
<https://doi.org/10.1200/JCO.2014.56.8253>  
PMID:[25332244](https://pubmed.ncbi.nlm.nih.gov/25332244/)
11. Xing M. BRAF mutation in thyroid cancer. *Endocr Relat Cancer*. 2005; 12:245-62.  
<https://doi.org/10.1677/erc.1.0978>  
PMID:[15947100](https://pubmed.ncbi.nlm.nih.gov/15947100/)
12. Xing M, Westra WH, Tufano RP, Cohen Y, Rosenbaum E, Rhoden KJ, Carson KA, Vasko V, Larin A, Tallini G, Tolaney S, Holt EH, Hui P, et al. BRAF mutation predicts a poorer clinical prognosis for papillary thyroid cancer. *J Clin Endocrinol Metab*. 2005; 90:6373-79.  
<https://doi.org/10.1210/jc.2005-0987>  
PMID:[16174717](https://pubmed.ncbi.nlm.nih.gov/16174717/)
13. Virk RK, Van Dyke AL, Finkelstein A, Prasad A, Gibson J, Hui P, Theoharis CG, Carling T, Roman SA, Sosa JA, Udelsman R, Prasad ML. BRAFV600E mutation in papillary thyroid microcarcinoma: a genotype-phenotype correlation. *Mod Pathol*. 2013; 26:62-70.  
<https://doi.org/10.1038/modpathol.2012.152>  
PMID:[22918165](https://pubmed.ncbi.nlm.nih.gov/22918165/)
14. Nam JK, Jung CK, Song BJ, Lim DJ, Chae BJ, Lee NS, Park WC, Kim JS, Jung SS, Bae JS. Is the BRAF(V600E) mutation useful as a predictor of preoperative risk in papillary thyroid cancer? *Am J Surg*. 2012; 203:436-41.  
<https://doi.org/10.1016/j.amjsurg.2011.02.013>  
PMID:[21803329](https://pubmed.ncbi.nlm.nih.gov/21803329/)
15. Ito Y, Yoshida H, Maruo R, Morita S, Takano T, Hirokawa M, Yabuta T, Fukushima M, Inoue H, Tomoda C, Kihara M, Uruno T, Higashiyama T, et al. BRAF mutation in papillary thyroid carcinoma in a Japanese population: its lack of correlation with high-risk clinicopathological features and disease-free survival of patients. *Endocr J*. 2009; 56:89-97.  
<https://doi.org/10.1507/endocrj.k08e-208>  
PMID:[18840924](https://pubmed.ncbi.nlm.nih.gov/18840924/)
16. Kim TY, Kim WB, Song JY, Rhee YS, Gong G, Cho YM,



- Kim SY, Kim SC, Hong SJ, Shong YK. The BRAF mutation is not associated with poor prognostic factors in Korean patients with conventional papillary thyroid microcarcinoma. *Clin Endocrinol (Oxf)*. 2005; 63:588–93.  
<https://doi.org/10.1111/j.1365-2265.2005.02389.x>  
PMID:16268813
17. Xing M, Liu R, Liu X, Murugan AK, Zhu G, Zeiger MA, Pai S, Bishop J. BRAF V600E and TERT promoter mutations cooperatively identify the most aggressive papillary thyroid cancer with highest recurrence. *J Clin Oncol*. 2014; 32:2718–26.  
<https://doi.org/10.1200/JCO.2014.55.5094>  
PMID:25024077
  18. Moon S, Song YS, Kim YA, Lim JA, Cho SW, Moon JH, Hahn S, Park DJ, Park YJ. Effects of coexistent *BRAF*<sup>V600E</sup> and *TERT* promoter mutations on poor clinical outcomes in papillary thyroid cancer: a meta-analysis. *Thyroid*. 2017; 27:651–60.  
<https://doi.org/10.1089/thy.2016.0350>  
PMID:28181854
  19. Pak K, Suh S, Kim SJ, Kim IJ. Prognostic value of genetic mutations in thyroid cancer: a meta-analysis. *Thyroid*. 2015; 25:63–70.  
<https://doi.org/10.1089/thy.2014.0241>  
PMID:25244593
  20. Abubaker J, Jehan Z, Bavi P, Sultana M, Al-Harbi S, Ibrahim M, Al-Nuaim A, Ahmed M, Amin T, Al-Fehaily M, Al-Sanea O, Al-Dayel F, Uddin S, Al-Kuraya KS. Clinicopathological analysis of papillary thyroid cancer with PIK3CA alterations in a middle eastern population. *J Clin Endocrinol Metab*. 2008; 93:611–18.  
<https://doi.org/10.1210/jc.2007-1717>  
PMID:18000091
  21. Cancer Genome Atlas Research Network. Integrated genomic characterization of papillary thyroid carcinoma. *Cell*. 2014; 159:676–90.  
<https://doi.org/10.1016/j.cell.2014.09.050>  
PMID:25417114
  22. Fraser SP, Pardo LA. Ion channels: functional expression and therapeutic potential in cancer. *Colloquium on ion channels and cancer*. *EMBO Rep*. 2008; 9:512–15.  
<https://doi.org/10.1038/embor.2008.75>  
PMID:18451877
  23. Asher V, Khan R, Warren A, Shaw R, Schalkwyk GV, Bali A, Sowter HM. The eag potassium channel as a new prognostic marker in ovarian cancer. *Diagn Pathol*. 2010; 5:78.  
<https://doi.org/10.1186/1746-1596-5-78>  
PMID:21138547
  24. Han Y, Liu C, Zhang D, Men H, Huo L, Geng Q, Wang S, Gao Y, Zhang W, Zhang Y, Jia Z. Mechanosensitive ion channel Piezo1 promotes prostate cancer development through the activation of the Akt/mTOR pathway and acceleration of cell cycle. *Int J Oncol*. 2019; 55:629–44.  
<https://doi.org/10.3892/ijo.2019.4839>  
PMID:31322184
  25. Mato E, Barceló-Batlloiri S, Orera I, Selva L, Corra M, González C, Bell O, Lerma E, Moral A, Pérez JI, de Leiva A. The proteomic 2D-DIGE approach reveals the protein voltage-dependent anion channel 2 as a potential therapeutic target in epithelial thyroid tumours. *Mol Cell Endocrinol*. 2015; 404:37–45.  
<https://doi.org/10.1016/j.mce.2015.01.021>  
PMID:25617717
  26. Gong Y, Yang J, Wu W, Liu F, Su A, Li Z, Zhu J, Wei T. Preserved SCN4B expression is an independent indicator of favorable recurrence-free survival in classical papillary thyroid cancer. *PLoS One*. 2018; 13:e0197007.  
<https://doi.org/10.1371/journal.pone.0197007>  
PMID:29723302
  27. Liu X, Wei L, Zhao B, Cai X, Dong C, Yin F. Low expression of KCNN3 may affect drug resistance in ovarian cancer. *Mol Med Rep*. 2018; 18:1377–86.  
<https://doi.org/10.3892/mmr.2018.9107>  
PMID:29901154
  28. Jiang S, Zhu L, Yang J, Hu L, Gu J, Xing X, Sun Y, Zhang Z. Integrated expression profiling of potassium channels identifies KCNN4 as a prognostic biomarker of pancreatic cancer. *Biochem Biophys Res Commun*. 2017; 494:113–19.  
<https://doi.org/10.1016/j.bbrc.2017.10.072>  
PMID:29050937
  29. Ibrahim S, Dakik H, Vandier C, Chautard R, Paintaud G, Mazurier F, Lecomte T, Guéguinou M, Raoul W. Expression profiling of calcium channels and calcium-activated potassium channels in colorectal cancer. *Cancers (Basel)*. 2019; 11:561.  
<https://doi.org/10.3390/cancers11040561>  
PMID:31010205
  30. Chiang EY, Li T, Jeet S, Peng I, Zhang J, Lee WP, DeVoss J, Caplazi P, Chen J, Warming S, Hackos DH, Mukund S, Koth CM, Grogan JL. Potassium channels Kv1.3 and KCa3.1 cooperatively and compensatorily regulate antigen-specific memory T cell functions. *Nat Commun*. 2017; 8:14644.  
<https://doi.org/10.1038/ncomms14644>  
PMID:28248292
  31. Chimote AA, Balajthy A, Arnold MJ, Newton HS, Hajdu P, Qualtieri J, Wise-Draper T, Conforti L. A defect in

- KCa3.1 channel activity limits the ability of CD8+ T cells from cancer patients to infiltrate an adenosine-rich microenvironment. *Sci Signal*. 2018; 11:eaq1616.  
<https://doi.org/10.1126/scisignal.aaq1616>  
PMID:29692361
32. Meigs TE, Fedor-Chaiken M, Kaplan DD, Brackenbury R, Casey PJ. Galpha12 and Galpha13 negatively regulate the adhesive functions of cadherin. *J Biol Chem*. 2002; 277:24594–600.  
<https://doi.org/10.1074/jbc.M201984200>  
PMID:11976333
33. Yang J, Weinberg RA. Epithelial-mesenchymal transition: at the crossroads of development and tumor metastasis. *Dev Cell*. 2008; 14:818–29.  
<https://doi.org/10.1016/j.devcel.2008.05.009>  
PMID:18539112
34. Mendez MG, Kojima S, Goldman RD. Vimentin induces changes in cell shape, motility, and adhesion during the epithelial to mesenchymal transition. *FASEB J*. 2010; 24:1838–51.  
<https://doi.org/10.1096/fj.09-151639>  
PMID:20097873
35. Nieto MA, Huang RY, Jackson RA, Thiery JP. Emt: 2016. *Cell*. 2016; 166:21–45.  
<https://doi.org/10.1016/j.cell.2016.06.028>  
PMID:27368099
36. Wheelock MJ, Shintani Y, Maeda M, Fukumoto Y, Johnson KR. Cadherin switching. *J Cell Sci*. 2008; 121:727–35.  
<https://doi.org/10.1242/jcs.000455> PMID:18322269
37. Renault TT, Dejean LM, Manon S. A brewing understanding of the regulation of bax function by bcl-xL and bcl-2. *Mech Ageing Dev*. 2017; 161:201–10.  
<https://doi.org/10.1016/j.mad.2016.04.007>  
PMID:27112371
38. Kunzelmann K. Ion channels and cancer. *J Membr Biol*. 2005; 205:159–73.  
<https://doi.org/10.1007/s00232-005-0781-4>  
PMID:16362504
39. Prevarskaya N, Skryma R, Shuba Y. Ion channels and the hallmarks of cancer. *Trends Mol Med*. 2010; 16:107–21.  
<https://doi.org/10.1016/j.molmed.2010.01.005>  
PMID:20167536
40. Schwab A, Stock C. Ion channels and transporters in tumour cell migration and invasion. *Philos Trans R Soc Lond B Biol Sci*. 2014; 369:20130102.  
<https://doi.org/10.1098/rstb.2013.0102>  
PMID:24493750
41. Xu S, Zhang L, Cheng X, Yu H, Bao J, Lu R. Capsaicin inhibits the metastasis of human papillary thyroid carcinoma BCPAP cells through the modulation of the TRPV1 channel. *Food Funct*. 2018; 9:344–54.  
<https://doi.org/10.1039/c7fo01295k>  
PMID:29185571
42. Zhang P, Yang X, Yin Q, Yi J, Shen W, Zhao L, Zhu Z, Liu J. Inhibition of SK4 potassium channels suppresses cell proliferation, migration and the epithelial-mesenchymal transition in triple-negative breast cancer cells. *PLoS One*. 2016; 11:e0154471.  
<https://doi.org/10.1371/journal.pone.0154471>  
PMID:27124117
43. Li QT, Feng YM, Ke ZH, Qiu MJ, He XX, Wang MM, Li YN, Xu J, Shi LL, Xiong ZF. KCNN4 promotes invasion and metastasis through the MAPK/ERK pathway in hepatocellular carcinoma. *J Investig Med*. 2020; 68:68–74.  
<https://doi.org/10.1136/jim-2019-001073>  
PMID:31431469
44. Du Y, Song W, Chen J, Chen H, Xuan Z, Zhao L, Chen J, Jin C, Zhou M, Tuo B, Zhao Y, Zheng S, Song P. The potassium channel KCa3.1 promotes cell proliferation by activating SKP2 and metastasis through the EMT pathway in hepatocellular carcinoma. *Int J Cancer*. 2019; 145:503–16.  
<https://doi.org/10.1002/ijc.32121>  
PMID:30628729
45. Rabjerg M, Oliván-Viguera A, Hansen LK, Jensen L, Sevelsted-Møller L, Walter S, Jensen BL, Marcussen N, Köhler R. High expression of KCa3.1 in patients with clear cell renal carcinoma predicts high metastatic risk and poor survival. *PLoS One*. 2015; 10:e0122992.  
<https://doi.org/10.1371/journal.pone.0122992>  
PMID:25848765
46. Crottès D, Félix R, Meley D, Chadet S, Herr F, Audiger C, Soriani O, Vandier C, Roger S, Angoulvant D, Velge-Roussel F. Immature human dendritic cells enhance their migration through KCa3.1 channel activation. *Cell Calcium*. 2016; 59:198–207.  
<https://doi.org/10.1016/j.ceca.2016.02.008>  
PMID:27020659
47. Chou CC, Lunn CA, Murgolo NJ. KCa3.1: target and marker for cancer, autoimmune disorder and vascular inflammation? *Expert Rev Mol Diagn*. 2008; 8:179–87.  
<https://doi.org/10.1586/14737159.8.2.179>  
PMID:18366304
48. Shen CT, Zhang XY, Qiu ZL, Sun ZK, Wei WJ, Song HJ, Luo QY. Thyroid autoimmune antibodies in patients with papillary thyroid carcinoma: a double-edged sword? *Endocrine*. 2017; 58:176–83.  
<https://doi.org/10.1007/s12020-017-1401-7>  
PMID:28884426
49. Jo K, Kim MH, Ha J, Lim Y, Lee S, Bae JS, Jung CK, Kang

- MI, Cha BY, Lim DJ. Prognostic value of preoperative anti-thyroglobulin antibody in differentiated thyroid cancer. *Clin Endocrinol (Oxf)*. 2017; 87:292–99.  
<https://doi.org/10.1111/cen.13367>  
PMID:[28493284](https://pubmed.ncbi.nlm.nih.gov/28493284/)
50. Vasileiadis I, Boutzios G, Charitoudis G, Koukouloti E, Karatzas T. Thyroglobulin antibodies could be a potential predictive marker for papillary thyroid carcinoma. *Ann Surg Oncol*. 2014; 21:2725–32.  
<https://doi.org/10.1245/s10434-014-3593-x>  
PMID:[24595799](https://pubmed.ncbi.nlm.nih.gov/24595799/)
51. Vasko V, Espinosa AV, Scouten W, He H, Auer H, Liyanarachchi S, Larin A, Savchenko V, Francis GL, de la Chapelle A, Saji M, Ringel MD. Gene expression and functional evidence of epithelial-to-mesenchymal transition in papillary thyroid carcinoma invasion. *Proc Natl Acad Sci USA*. 2007; 104:2803–08.  
<https://doi.org/10.1073/pnas.0610733104>  
PMID:[17296934](https://pubmed.ncbi.nlm.nih.gov/17296934/)
52. Hanahan D, Weinberg RA. The hallmarks of cancer. *Cell*. 2000; 100:57–70.  
[https://doi.org/10.1016/s0092-8674\(00\)81683-9](https://doi.org/10.1016/s0092-8674(00)81683-9)  
PMID:[10647931](https://pubmed.ncbi.nlm.nih.gov/10647931/)
53. Chakraborty S, Mir KB, Seligson ND, Nayak D, Kumar R, Goswami A. Integration of EMT and cellular survival instincts in reprogramming of programmed cell death to anastasis. *Cancer Metastasis Rev*. 2020; 39:553–66.  
<https://doi.org/10.1007/s10555-020-09866-x>  
PMID:[32020420](https://pubmed.ncbi.nlm.nih.gov/32020420/)
54. Barrallo-Gimeno A, Nieto MA. The snail genes as inducers of cell movement and survival: implications in development and cancer. *Development*. 2005; 132:3151–61.  
<https://doi.org/10.1242/dev.01907>  
PMID:[15983400](https://pubmed.ncbi.nlm.nih.gov/15983400/)
55. Wu Y, Tang L. Bcl-2 family proteins regulate apoptosis and epithelial to mesenchymal transition by calcium signals. *Curr Pharm Des*. 2016; 22:4700–04.  
<https://doi.org/10.2174/1381612822666160506125937>  
PMID:[27150132](https://pubmed.ncbi.nlm.nih.gov/27150132/)
56. Rusinek D, Swierniak M, Chmielik E, Kowal M, Kowalska M, Cyplinska R, Czarniecka A, Piglowski W, Korfanty J, Chekan M, Krajewska J, Szpak-Ulczo S, Jarzab M, et al. BRAFV600E-associated gene expression profile: early changes in the transcriptome, based on a transgenic mouse model of papillary thyroid carcinoma. *PLoS One*. 2015; 10:e0143688.  
<https://doi.org/10.1371/journal.pone.0143688>  
PMID:[26625260](https://pubmed.ncbi.nlm.nih.gov/26625260/)
57. Salvatore G, Nappi TC, Salerno P, Jiang Y, Garbi C, Ugolini C, Miccoli P, Basolo F, Castellone MD, Cirafici AM, Melillo RM, Fusco A, Bittner ML, Santoro M. A cell proliferation and chromosomal instability signature in anaplastic thyroid carcinoma. *Cancer Res*. 2007; 67:10148–58.  
<https://doi.org/10.1158/0008-5472.CAN-07-1887>  
PMID:[17981789](https://pubmed.ncbi.nlm.nih.gov/17981789/)
58. Li T, Fan J, Wang B, Traugh N, Chen Q, Liu JS, Li B, Liu XS. TIMER: a web server for comprehensive analysis of tumor-infiltrating immune cells. *Cancer Res*. 2017; 77:e108–10.  
<https://doi.org/10.1158/0008-5472.CAN-17-0307>  
PMID:[29092952](https://pubmed.ncbi.nlm.nih.gov/29092952/)
59. Tang Z, Li C, Kang B, Gao G, Li C, Zhang Z. GEPIA: a web server for cancer and normal gene expression profiling and interactive analyses. *Nucleic Acids Res*. 2017; 45:W98–102.  
<https://doi.org/10.1093/nar/gkx247>  
PMID:[28407145](https://pubmed.ncbi.nlm.nih.gov/28407145/)
60. Mootha VK, Lindgren CM, Eriksson KF, Subramanian A, Sihag S, Lehar J, Puigserver P, Carlsson E, Ridderstråle M, Laurila E, Houstis N, Daly MJ, Patterson N, et al. PGC-1alpha-responsive genes involved in oxidative phosphorylation are coordinately downregulated in human diabetes. *Nat Genet*. 2003; 34:267–73.  
<https://doi.org/10.1038/ng1180>  
PMID:[12808457](https://pubmed.ncbi.nlm.nih.gov/12808457/)

## SUPPLEMENTARY MATERIALS

### Supplementary Tables

**Supplementary Table 1. The primer sequences.**

| Gene       | Sequence                                               |
|------------|--------------------------------------------------------|
| KCNN4      | F-GCAGAGGAGTAAGAAGGTGGAA<br>R-TGGCAGGAACTGGCATTG       |
| GAPDH      | F-GTCTCCTCTGACTTCAACAGCG<br>R-ACCACCCTGTTGCTGTAGCCAA   |
| E-cadherin | F-AGTCACTGACACCAACGATAAT<br>R-ATCGTTGTTCACTGGATTTGTG   |
| N-cadherin | F-CGATAAGGATCAACCCCATACA<br>R-TTCAAAGTCGATTGGTTTGACC   |
| Vimentin   | F-CCGACACTCCTACAAGATTTAGA<br>R-CAAAGATTTATTGAAGGAGAACC |
| Slug       | F-CTGTGACAAGGAATATGTGAGC<br>R-CTAATGTGTCCTTGAAGCAACC   |
| Bcl-2      | F-GACTTCGCCGAGATGTCCAG<br>R-GAACTCAAAGAAGGCCACAATC     |
| Bax        | F-CGAACTGGACAGTAACATGGAG<br>R-CAGTTTGCTGGCAAAGTAGAAA   |

Abbreviations: F, forward sequence; R, reverse sequence.

**Supplementary Table 2. List of antibodies.**

| Target         | Source | Dilution | Company and catalog number |
|----------------|--------|----------|----------------------------|
| KCNN4          | Rabbit | 1:1000   | Proteintech, 23271-1-AP    |
| $\beta$ -Actin | Mouse  | 1:5000   | Proteintech, 60008-1-Ig    |
| E-cadherin     | Rabbit | 1:5000   | Proteintech, 20874-1-AP    |
| N-cadherin     | Rabbit | 1:2000   | Proteintech, 22018-1-AP    |
| Vimentin       | Rabbit | 1:5000   | Proteintech, 10366-1-AP    |
| Slug           | Rabbit | 1:500    | Proteintech, 12129-1-AP    |
| Bcl-2          | Rabbit | 1:500    | Abcam, ab59348             |
| Bcl-xl         | Rabbit | 1:1000   | Abcam, ab32370             |
| Bax            | Rabbit | 1:4000   | Proteintech, 50599-2-Ig    |
