# Supplementary material for: KCNN4 is a diagnostic and prognostic biomarker that promotes papillary thyroid cancer progression
Source: publisher site journal article supplement (doi:10.18632/aging.103710), 2020-08-20
Supplement: Supplementary file [file aging-v12i16-103710-supplementary-material-SD1.pdf]

## SUPPLEMENTARY TABLES

**Supplementary Table 1. The primer sequences.**

| Gene       | Sequence                                               |
|------------|--------------------------------------------------------|
| KCNN4      | F-GCAGAGGAGTAAGAAGGTGGAA<br>R-TGGCAGGAACTGGCATTG       |
| GAPDH      | F-GTCTCCTCTGACTTCAACAGCG<br>R-ACCACCCTGTTGCTGTAGCCAA   |
| E-cadherin | F-AGTCACTGACACCAACGATAAT<br>R-ATCGTTGTTCACTGGATTTGTG   |
| N-cadherin | F-CGATAAGGATCAACCCCATACA<br>R-TTCAAAGTCGATTGGTTTGACC   |
| Vimentin   | F-CCGACACTCCTACAAGATTTAGA<br>R-CAAAGATTTATTGAAGGAGAACC |
| Slug       | F-CTGTGACAAGGAATATGTGAGC<br>R-CTAATGTGTCCTTGAAGCAACC   |
| Bcl-2      | F-GACTTCGCCGAGATGTCCAG<br>R-GAACTCAAAGAAGGCCACAATC     |
| Bax        | F-CGAACTGGACAGTAACATGGAG<br>R-CAGTTTGCTGGCAAAGTAGAAA   |

Abbreviations: F, forward sequence; R, reverse sequence.

**Supplementary Table 2. List of antibodies.**

| Target         | Source | Dilution | Company and catalog number |
|----------------|--------|----------|----------------------------|
| KCNN4          | Rabbit | 1:1000   | Proteintech, 23271-1-AP    |
| $\beta$ -Actin | Mouse  | 1:5000   | Proteintech, 60008-1-Ig    |
| E-cadherin     | Rabbit | 1:5000   | Proteintech, 20874-1-AP    |
| N-cadherin     | Rabbit | 1:2000   | Proteintech, 22018-1-AP    |
| Vimentin       | Rabbit | 1:5000   | Proteintech, 10366-1-AP    |
| Slug           | Rabbit | 1:500    | Proteintech, 12129-1-AP    |
| Bcl-2          | Rabbit | 1:500    | Abcam, ab59348             |
| Bcl-xl         | Rabbit | 1:1000   | Abcam, ab32370             |
| Bax            | Rabbit | 1:4000   | Proteintech, 50599-2-Ig    |
